# Supplementary material for: Obesity enriches for tumor protective microbial metabolites and treatment refractory cells to confer therapy resistance in PDAC
Source: PubMed Central journal article supplement (PMC9275504; doi:10.1080/19490976.2022.2096328), 2022-07-11
Supplement: KGMI_A_2096328_SM3232.pdf [file KGMI_A_2096328_SM3232.pdf]

## Supplementary Figure legends

**Supplementary Figure 1. Gut microbiome changes in lean vs obese animals** :Relative abundance was observed at the class level as well (A). There was no observable difference in the relative abundance between the lean and obese animals treated with Gem/Pac (B).

**Supplementary Figure 2: Metabolic and physiological changes in obese animals** Animals on high fat diet predictably showed increase in body weight after 30 days on their diet, whether adjusted control/lean or high fat/obesogenic (A). An increase in blood glucose (B), triglyceride (C) and cholesterol (D) levels was observed in the obese mice on high fat diet compared to those on adjusted control diet. There was no significant difference in the tumor take between the two groups (E). In the animals on high fat diet, the tumor progressed faster compared to those in the adjusted control diet (F) and showed accumulation of lipids (G). Tumor volume in PANC02 cell derived tumors in Adjusted control diet and high fat diet fed mice. \* represents significant difference in the results (H).

**Supplementary Figure 3. Queuosine induced proliferation in pancreatic cancer cells** Mia-PACA2(A) and S2VP10 (B). Estimation of SAM in adjusted control diet fed and high fat diet fed mice. \* represents significant difference in the results (C)

**Supplementary Figure 4. Gene expression changes with queuosine.** Treatment of pancreatic cancer cells with queuosine changed expression of genes as seen in oxidative stress PCR array analysis A-C. Efficacy of silencing PRDX1 in pancreatic cancer cells (D). Silencing PRDX1 did not lead to cell death (E).

**Supplementary Figure 5. Obesity and stemness:** Serum cytokine analysis of lean vs obese animals (A) Quantitation of CD133+ staining near lipid droplets (B). Summary of adipocyte conditioned media induced increase in CD133+ population n=3 (C). Treatment with adipocyte conditioned media as well as preQ increased expression of drug resistance genes (D) Treatment with pre-Q did not change CSC gene expression (E).

A.

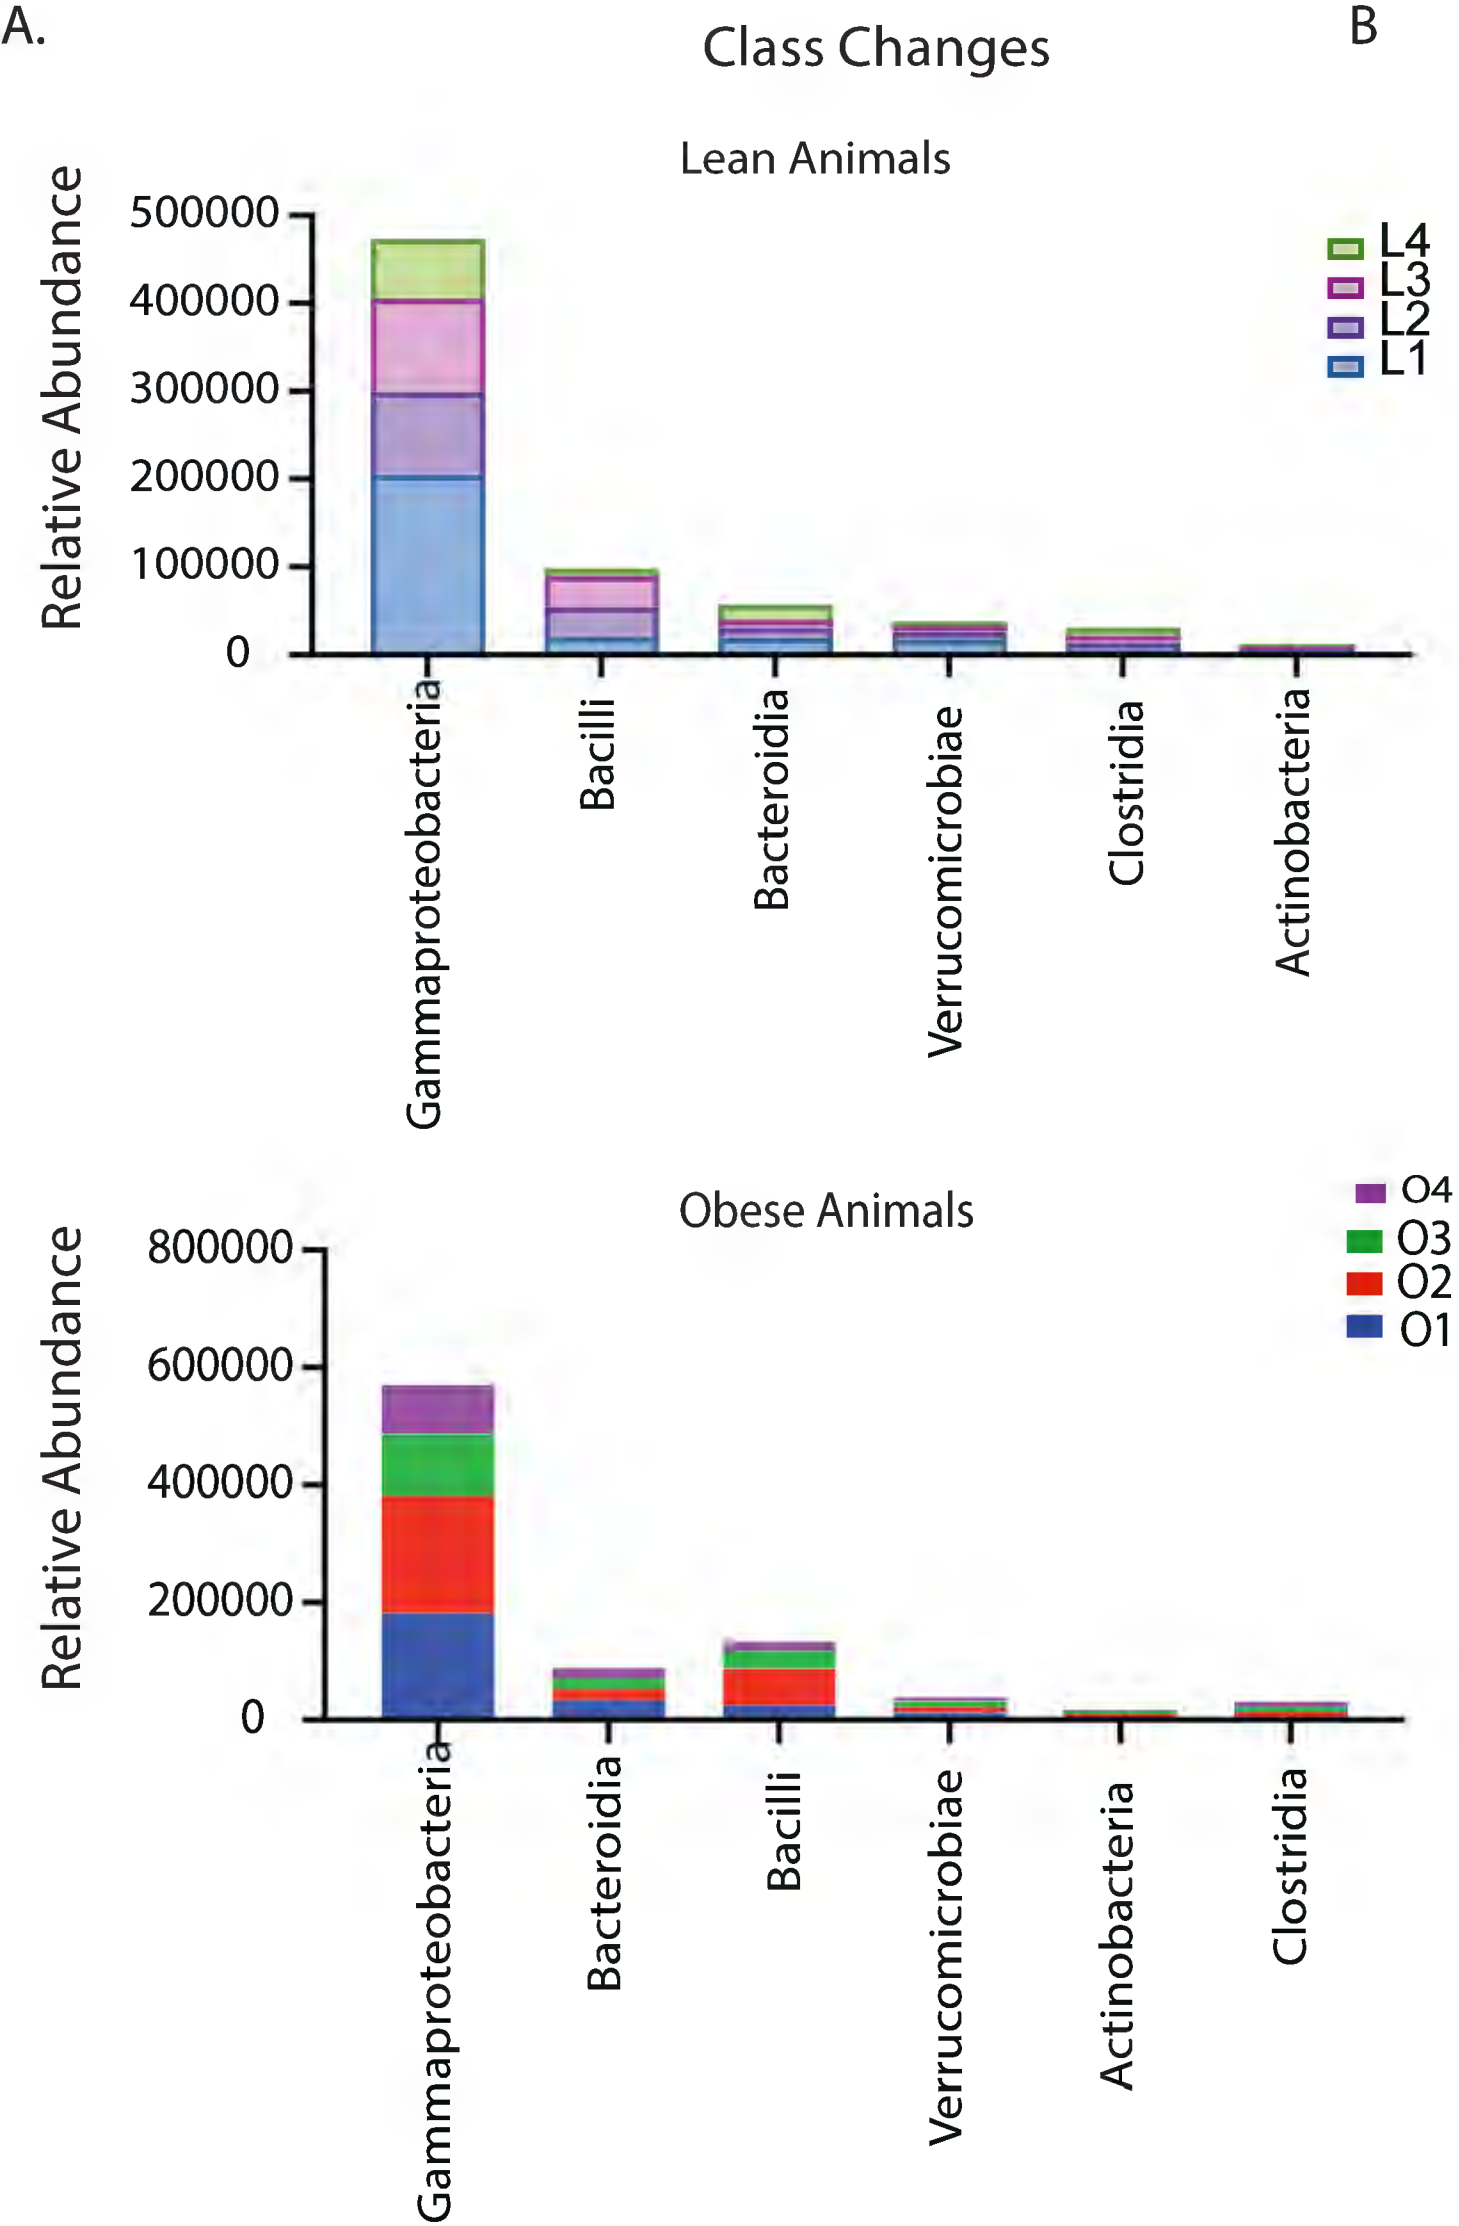

B

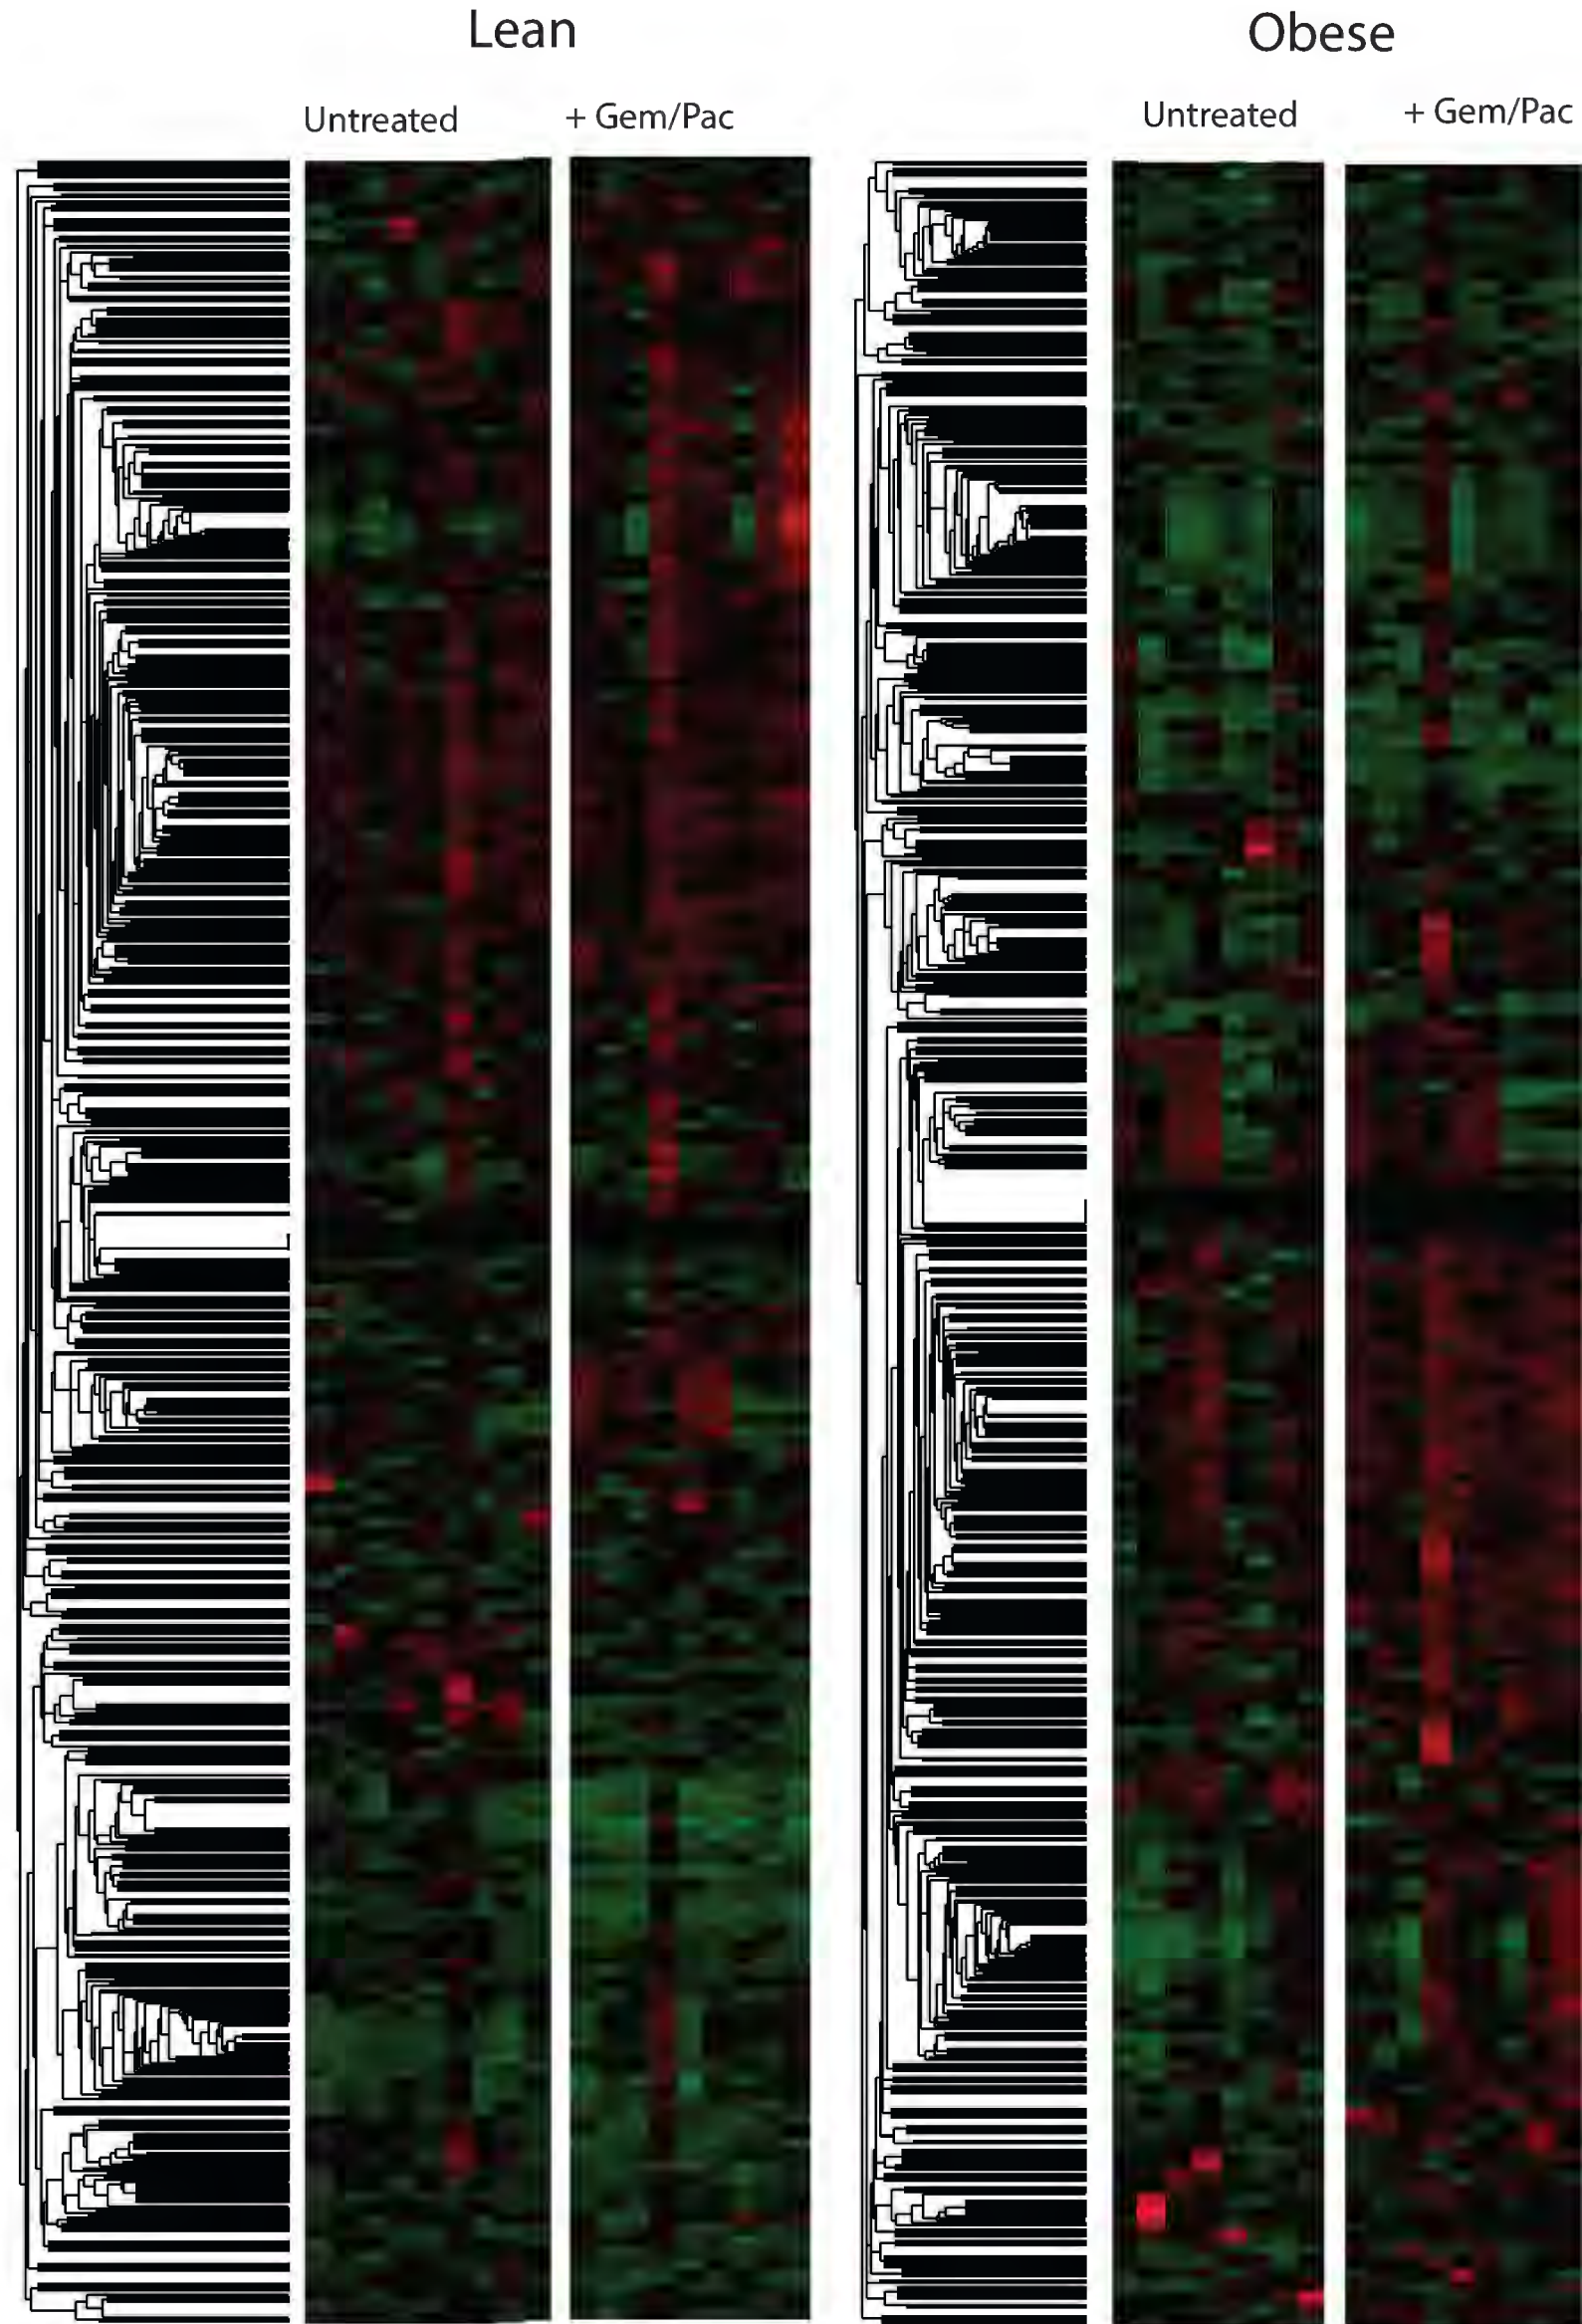

A.

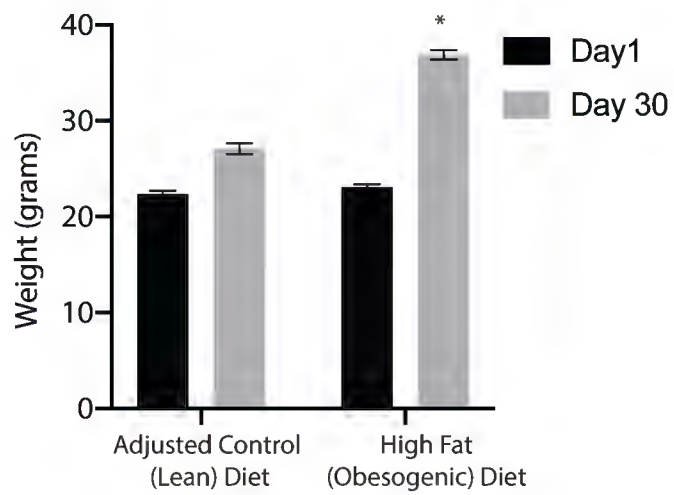

B.

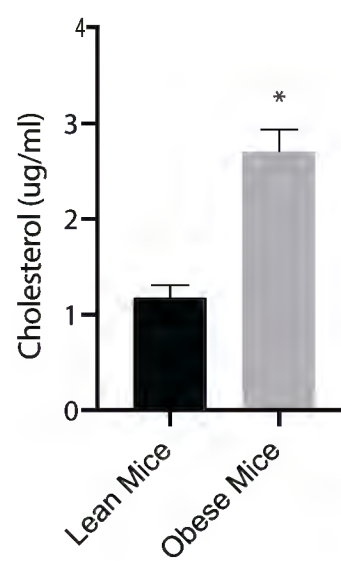

C.

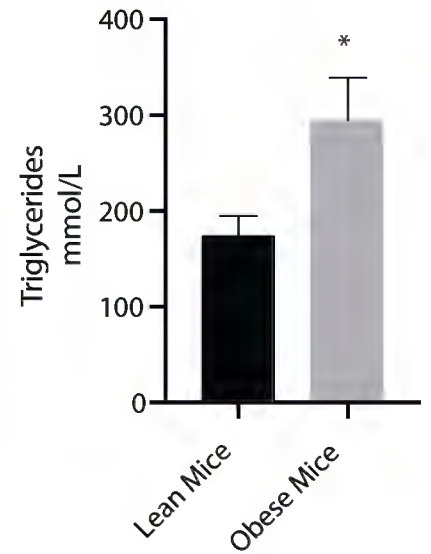

D.

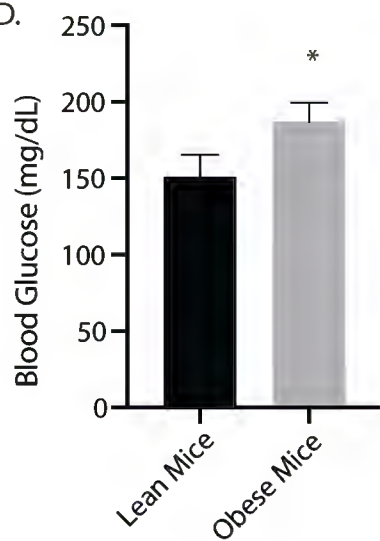

E.

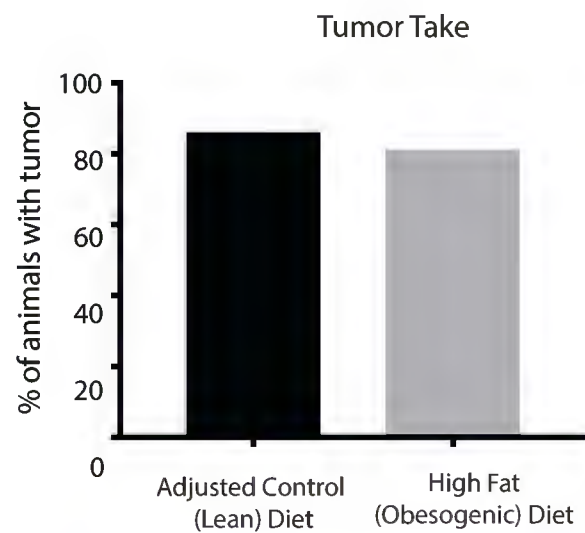

F.

Tumor progression

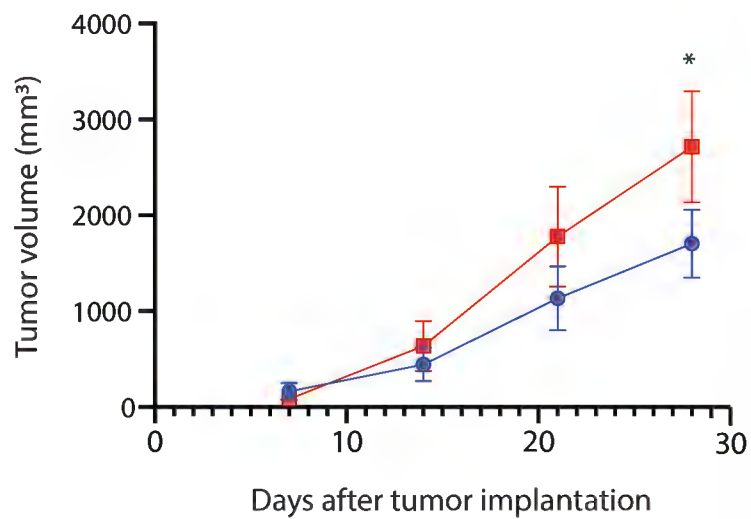

● Adjusted Control  
 ■ High Fat Diet

G.

Adjusted Control Diet

High Fat Diet

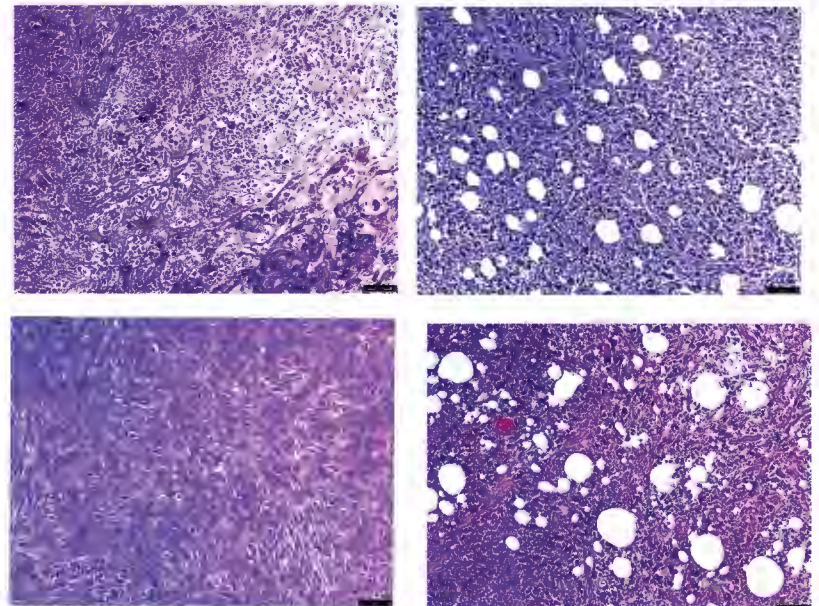

H&amp;E staining of representative tumors

A.

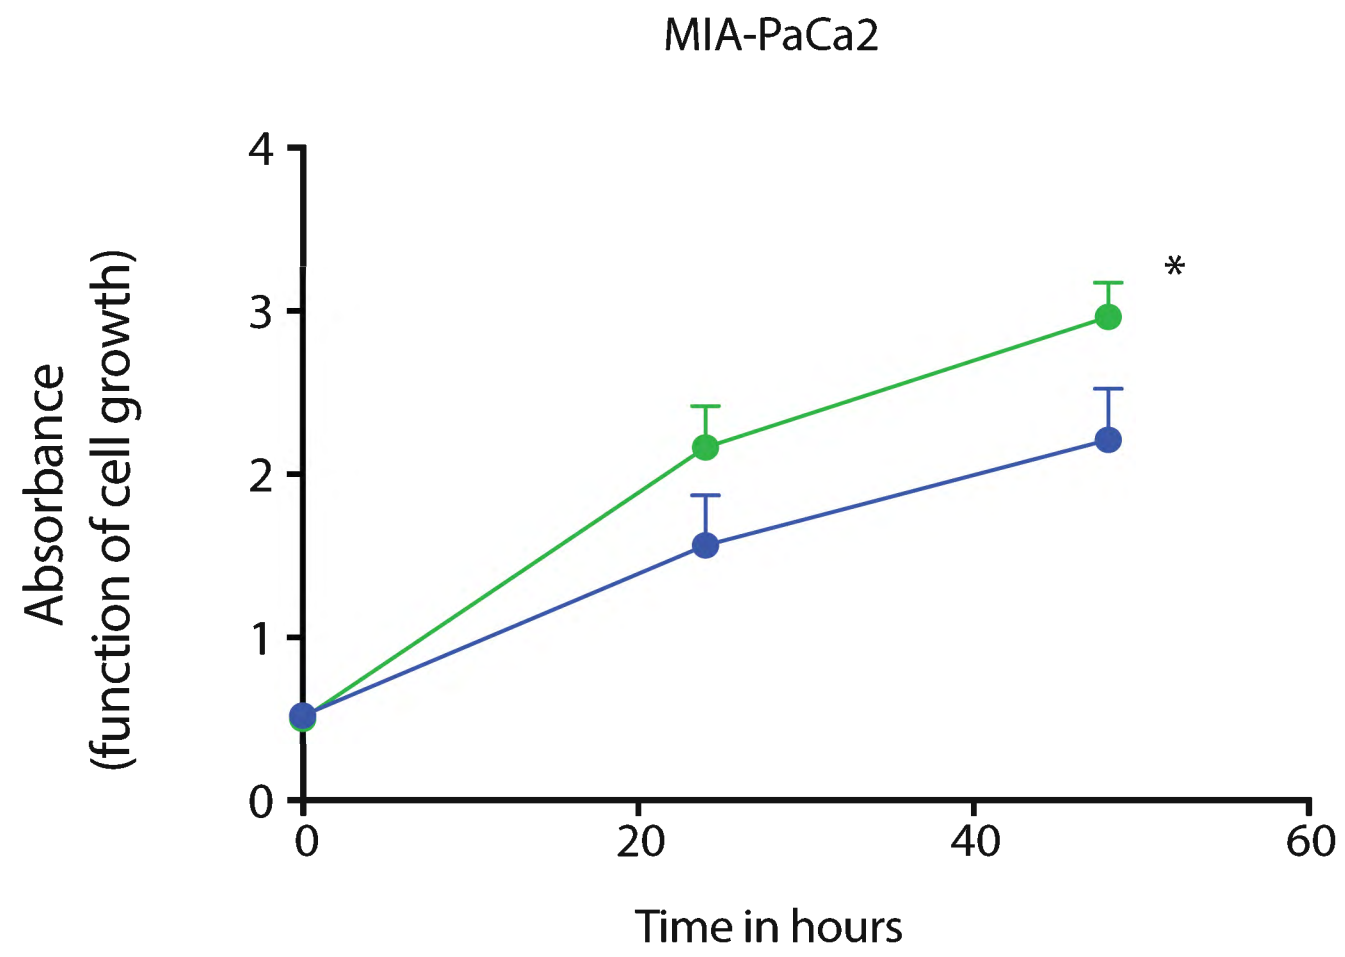

B.

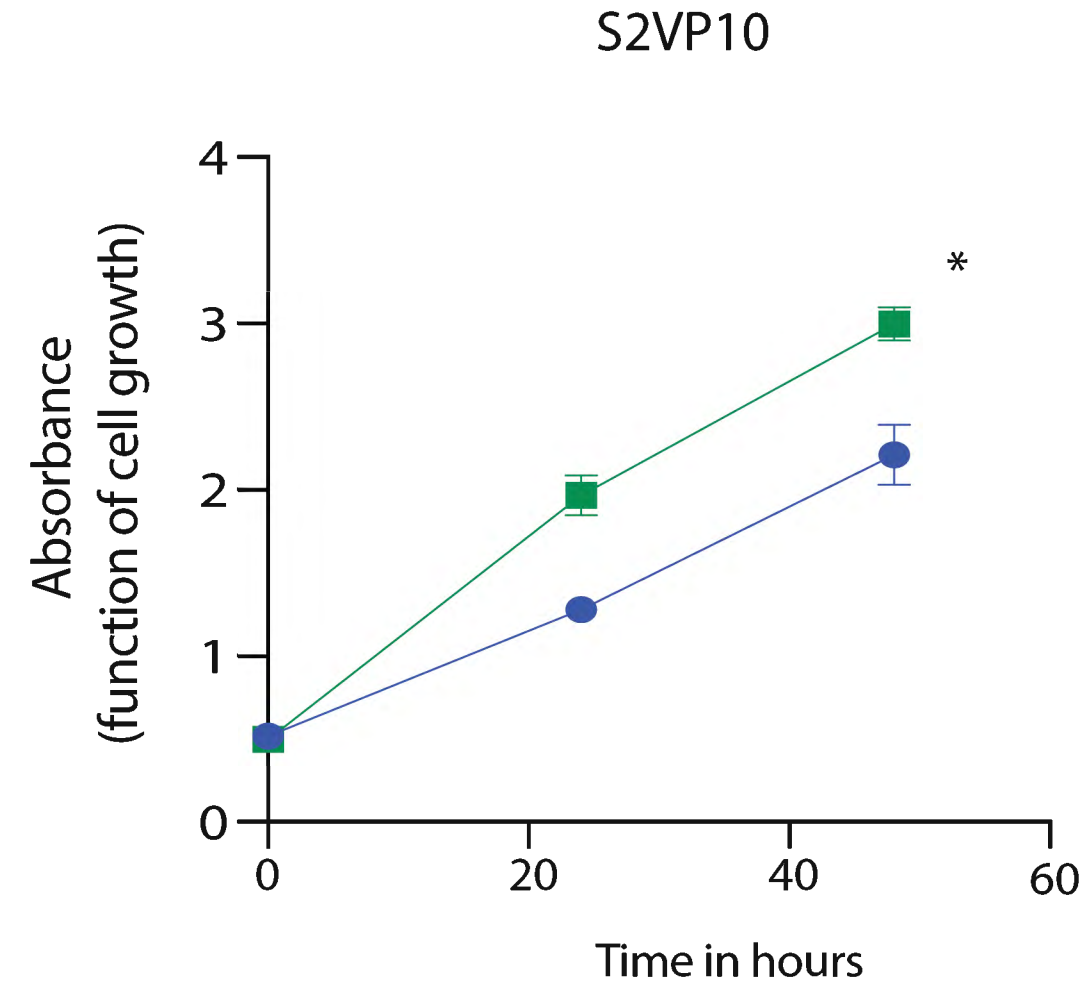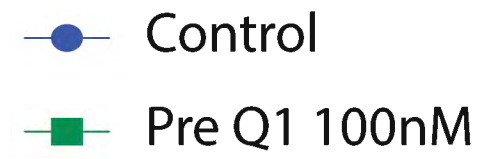

Fold change in mRNA expression  
(Normalized to Control)

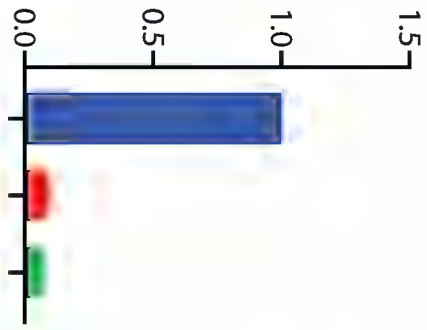

- NS
- 10nM siPRDX1
- 20nM siPRDX1

Viability  
Normalized to untreated

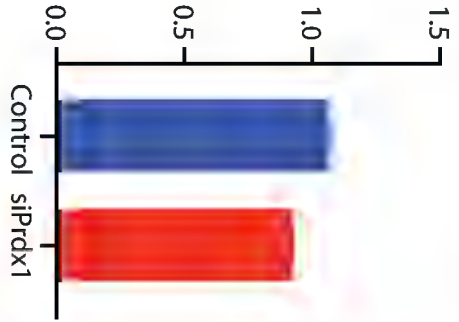

siPRDX1 efficiency

- ..... Control
- PreQ 50 nM

Fold change over control

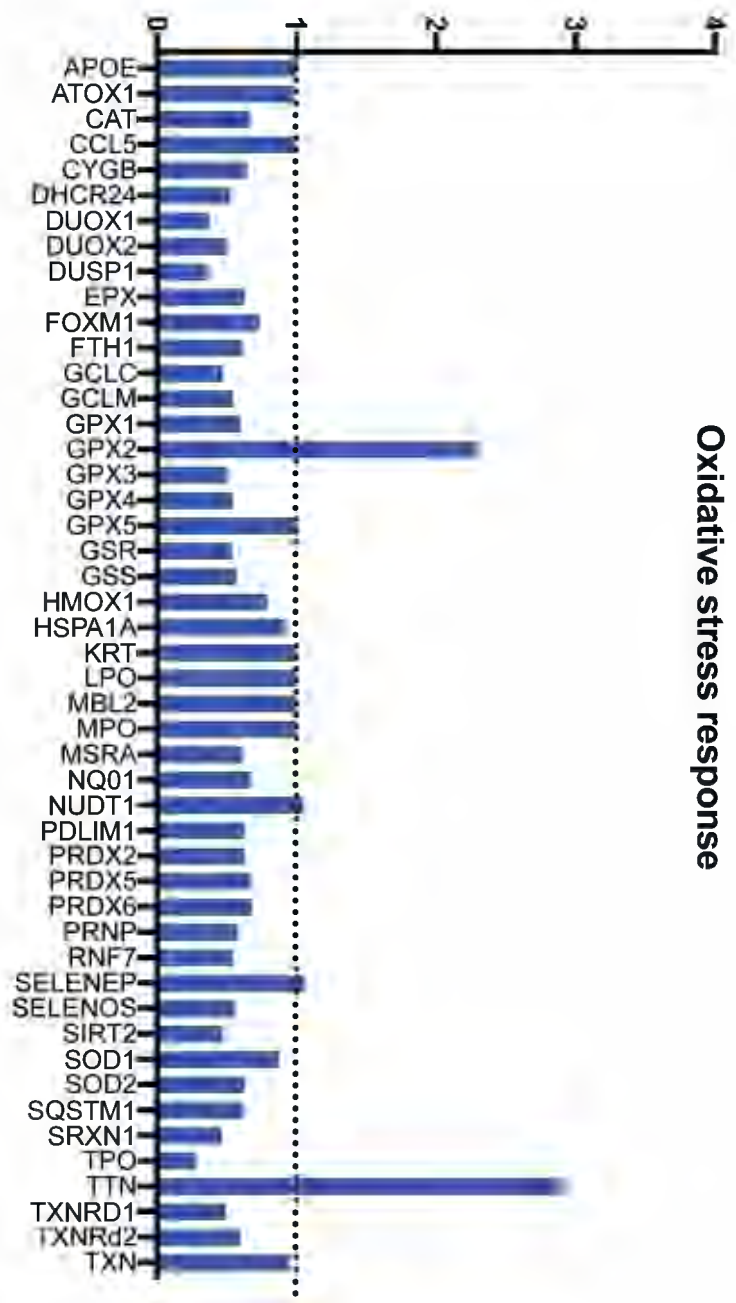

Oxidative stress response

Fold change over control

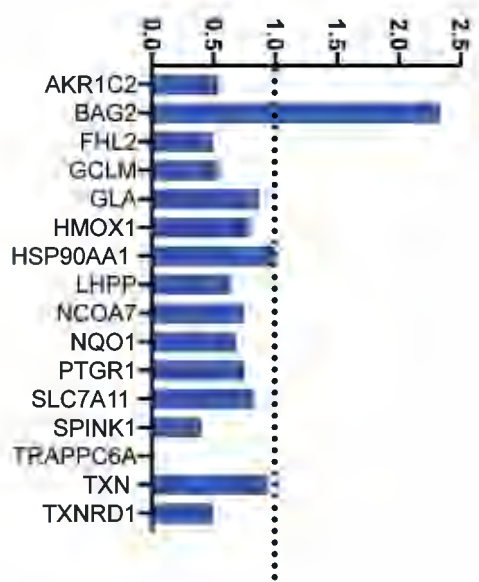

Pathway Activity

Fold change over control

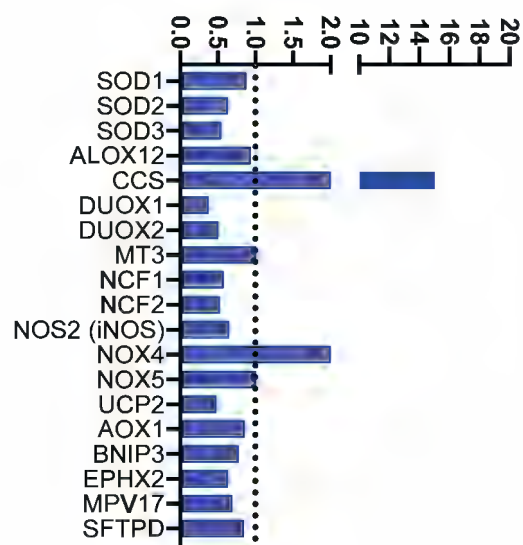

ROS metabolism

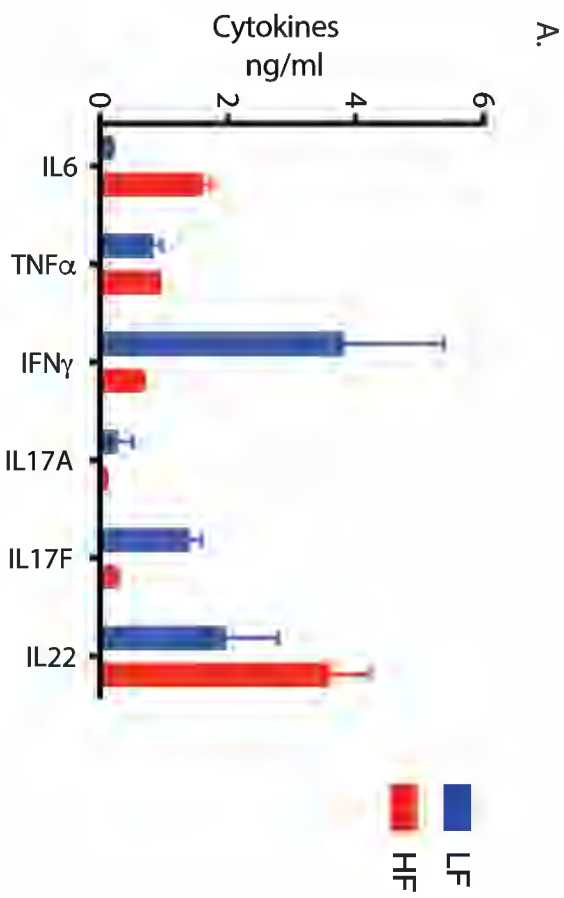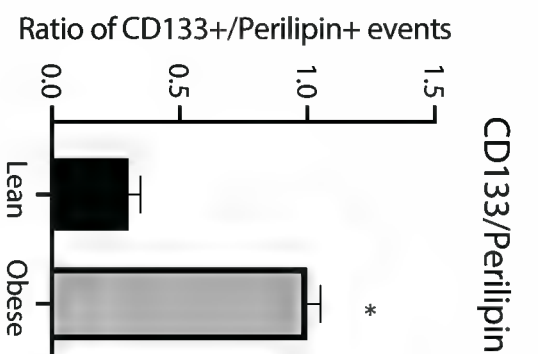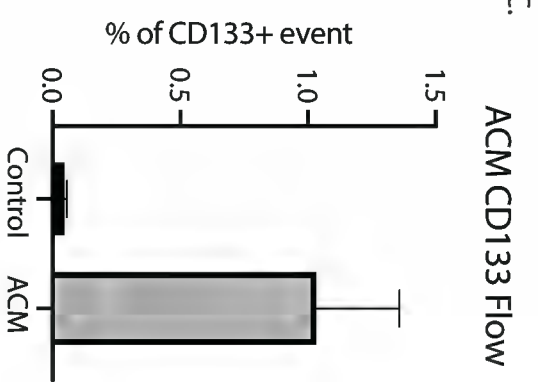

**D.** Drug resistance gene expression

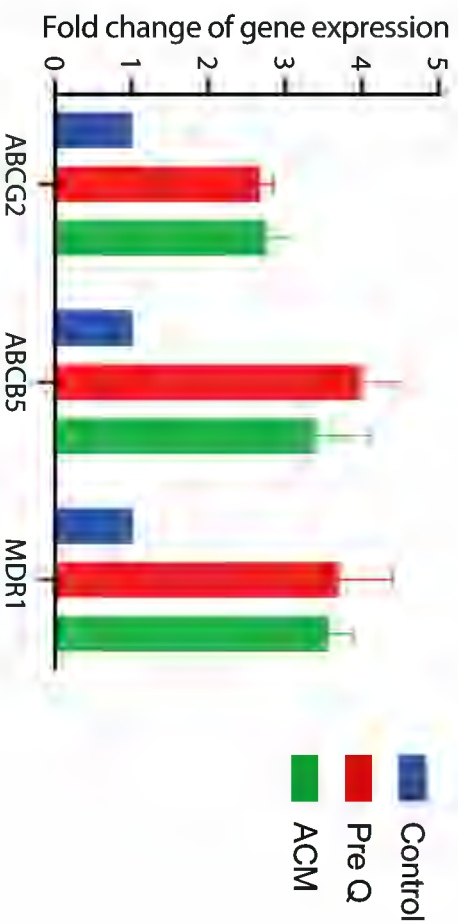

**E.** Adipocyte conditioned media

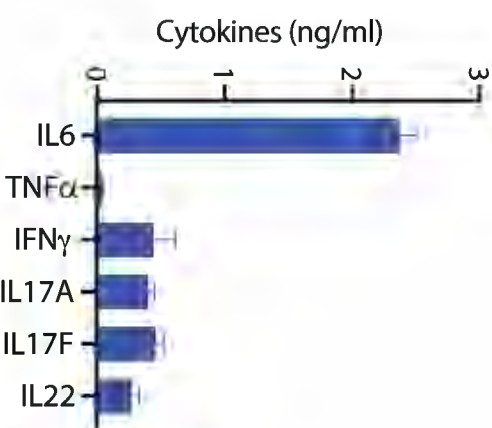

**F.**

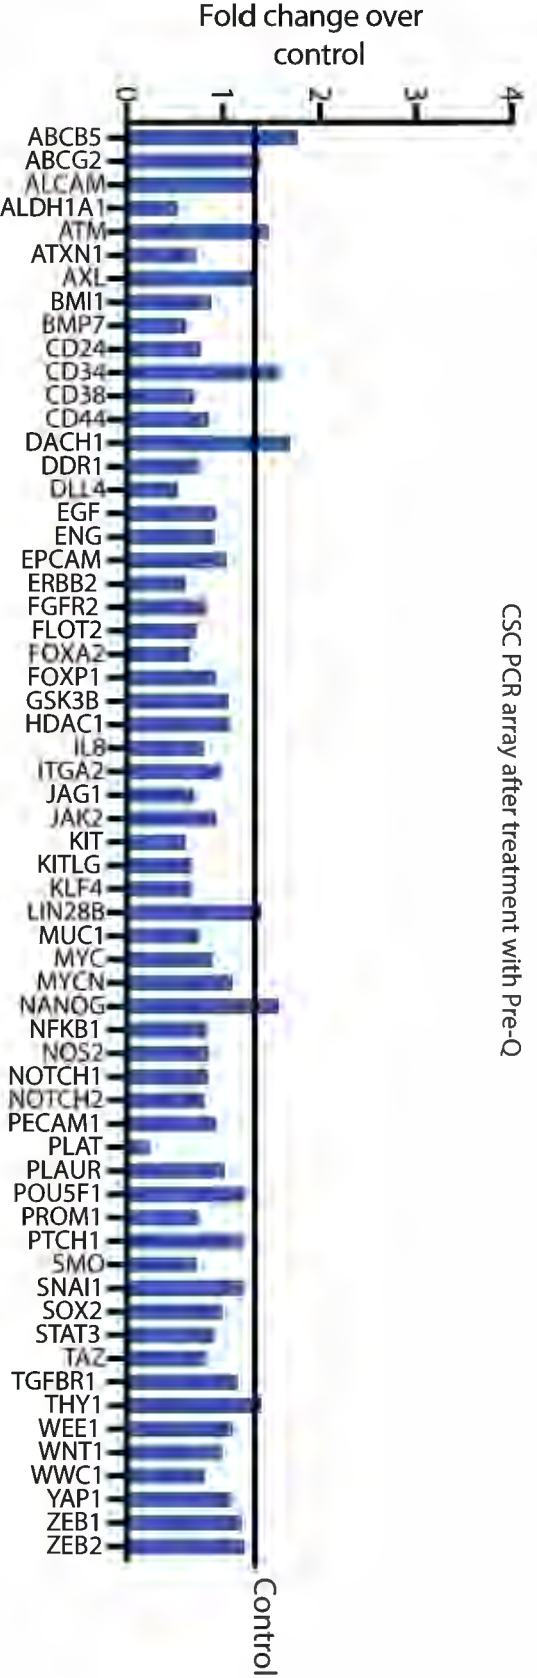

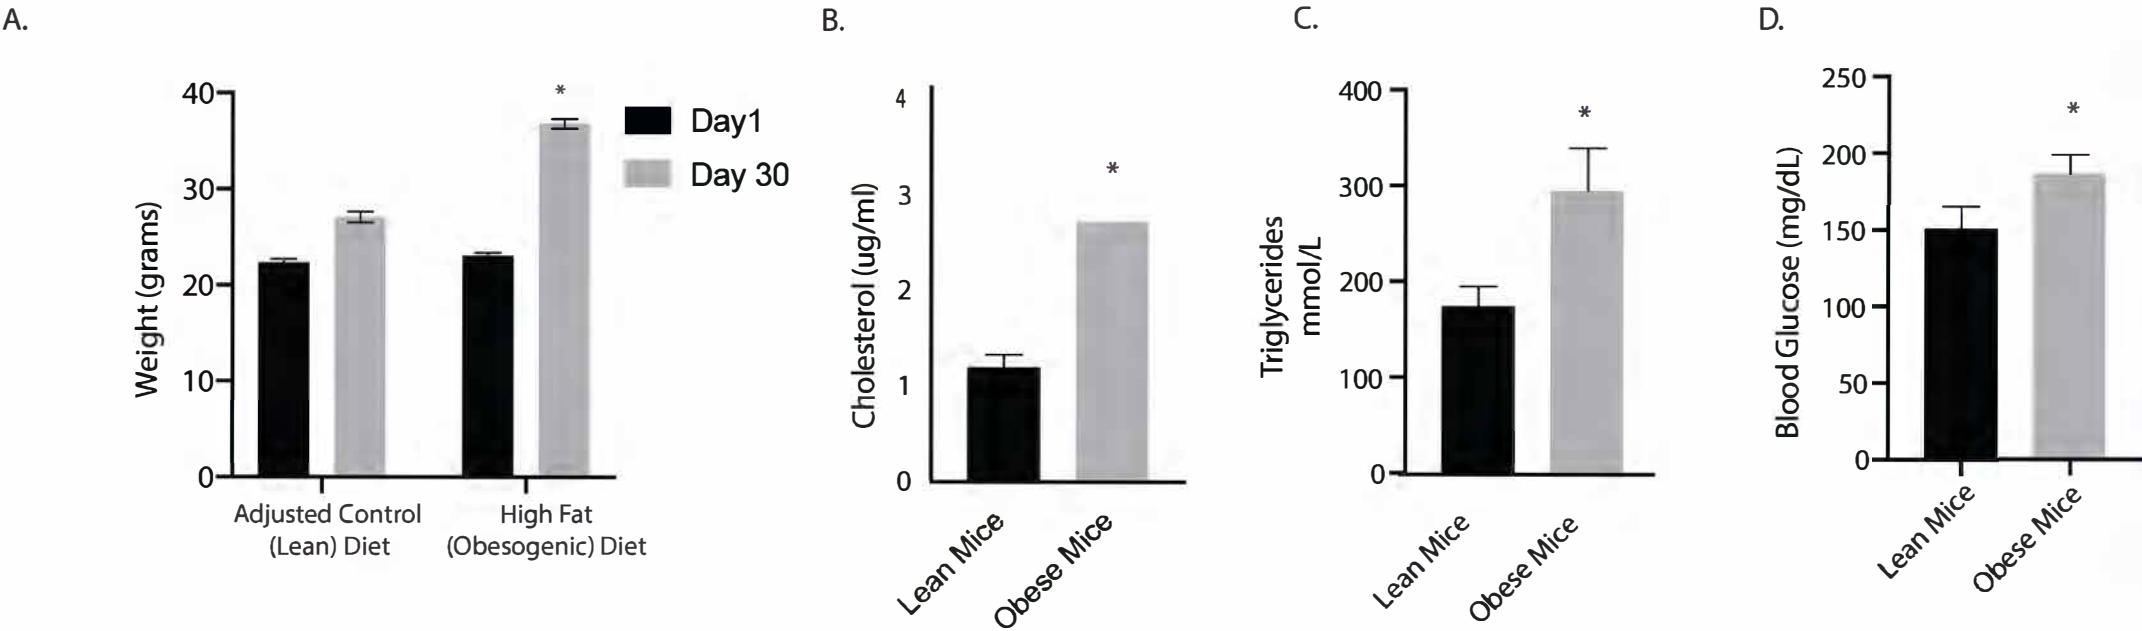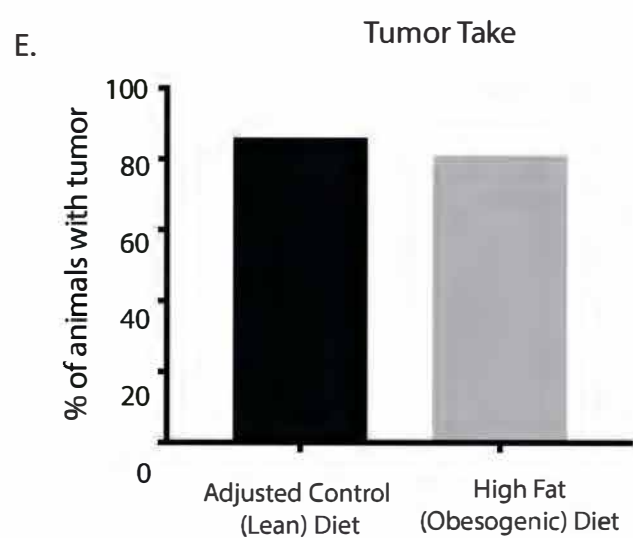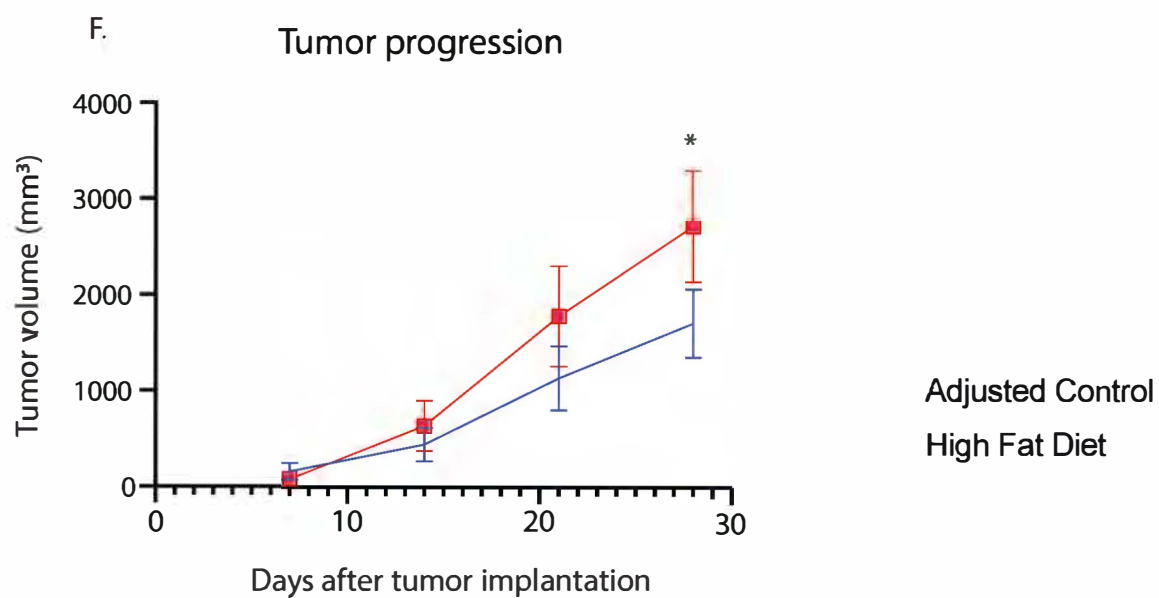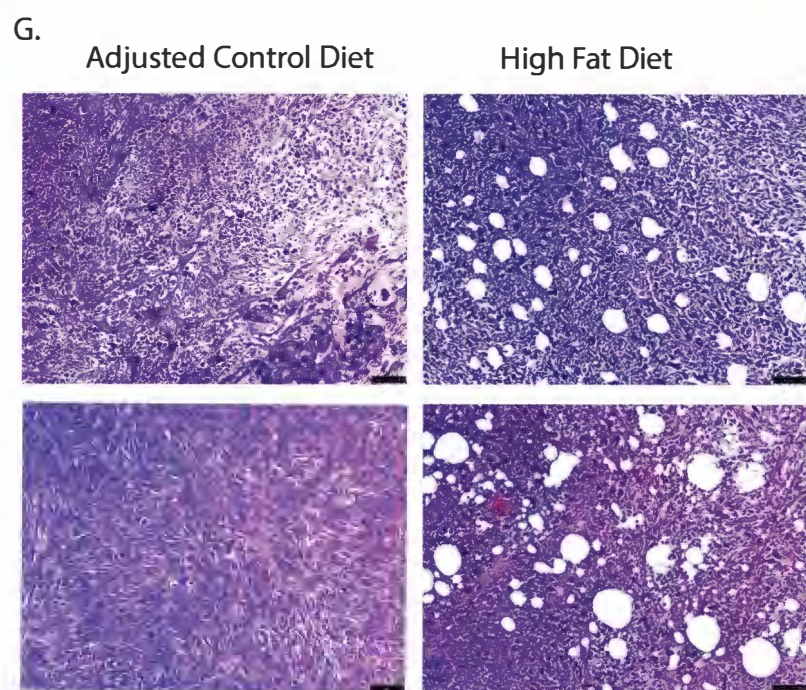

H&E staining of representative tumors

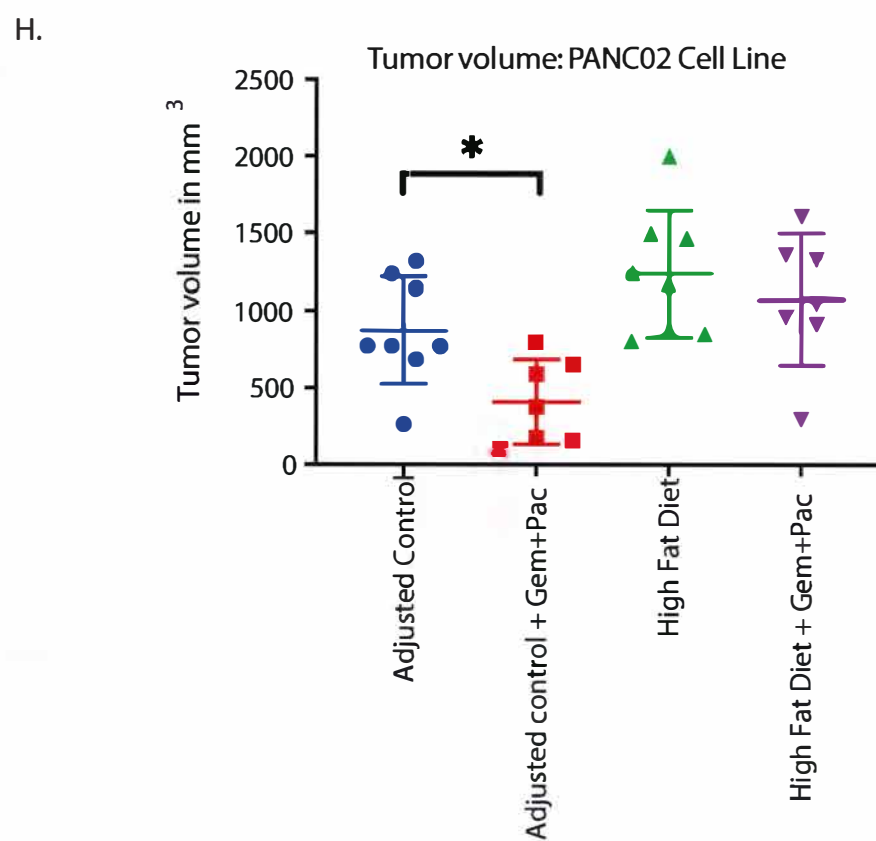

A.

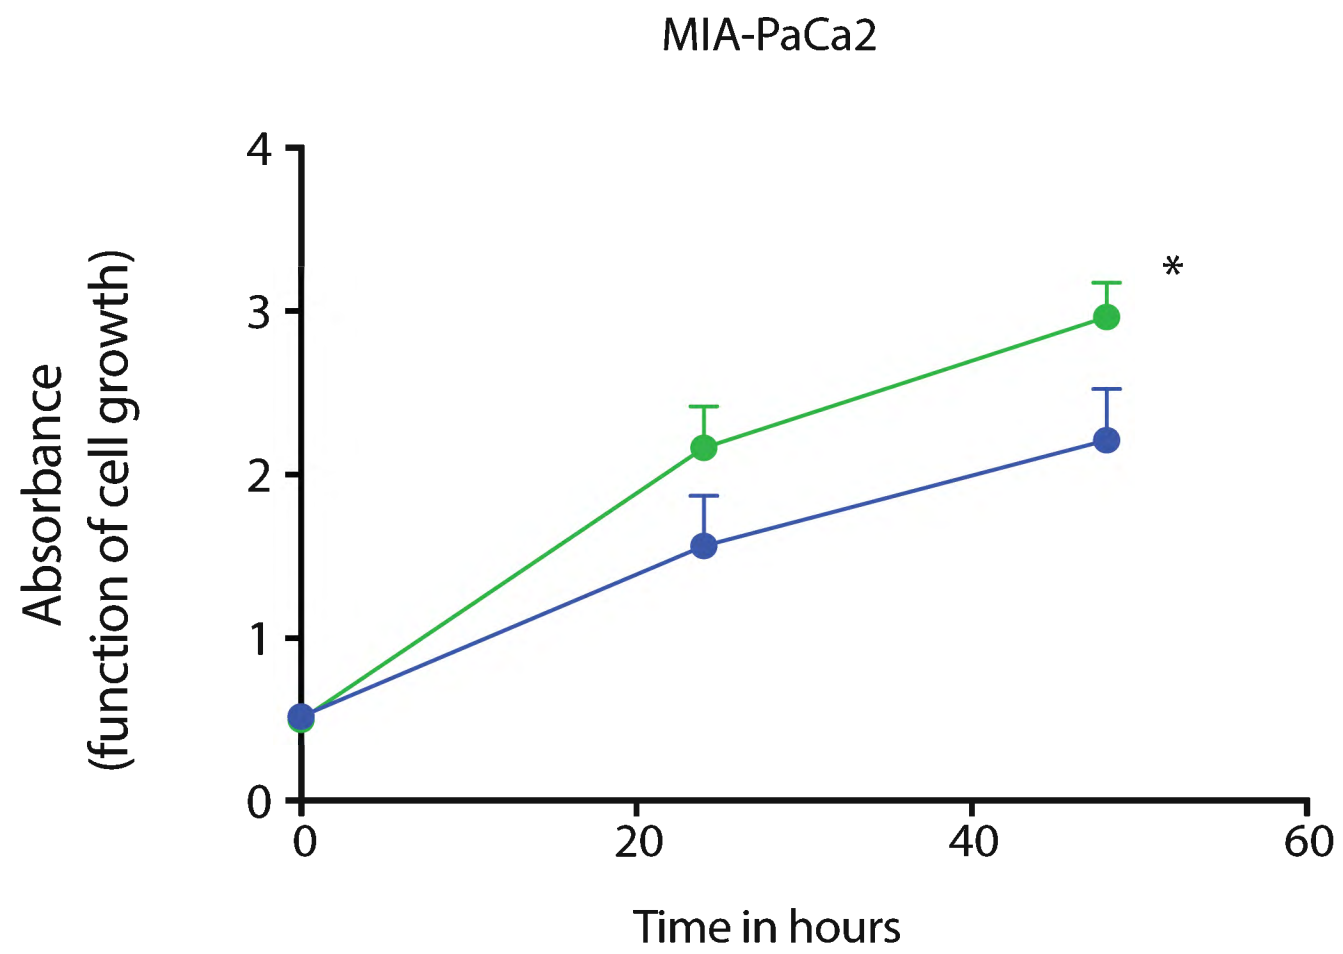

B.

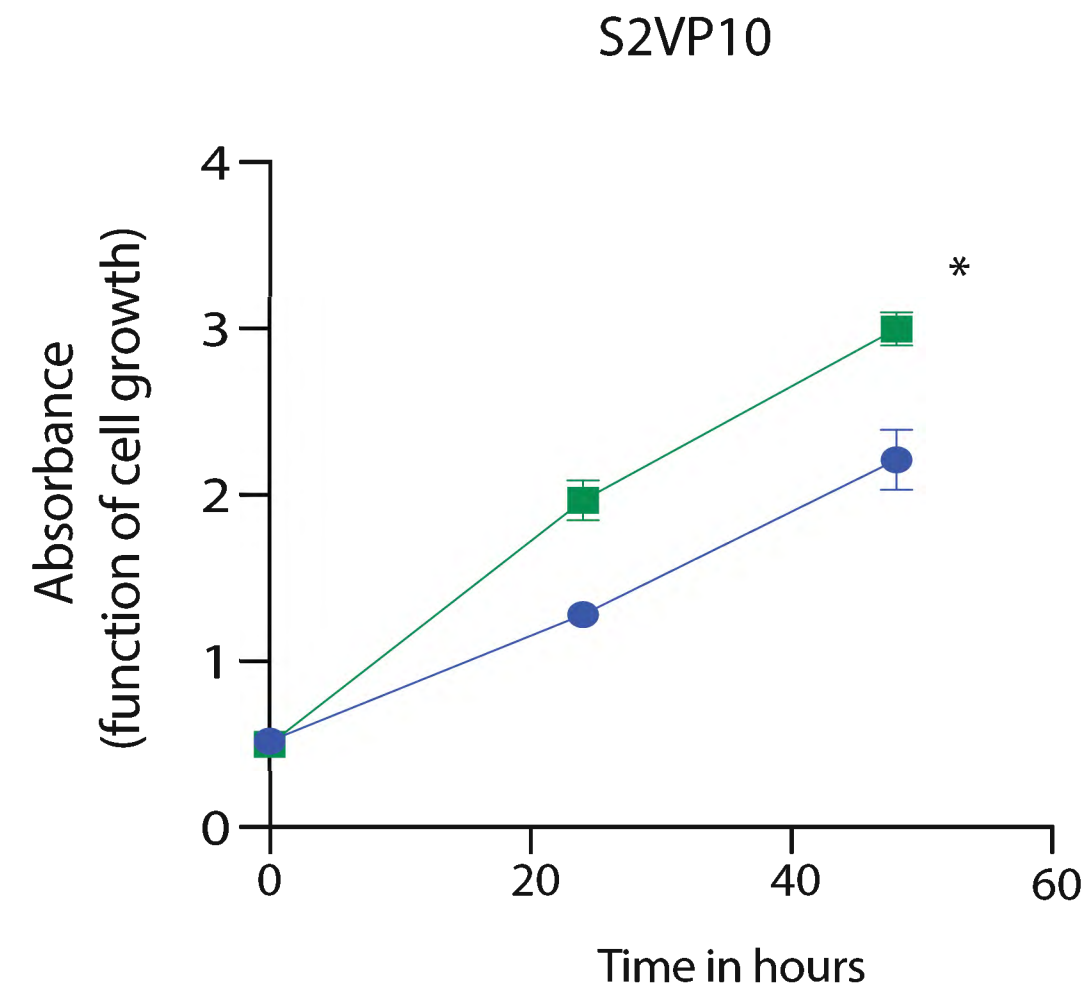

● Control  
■ Pre Q1 100nM

C.

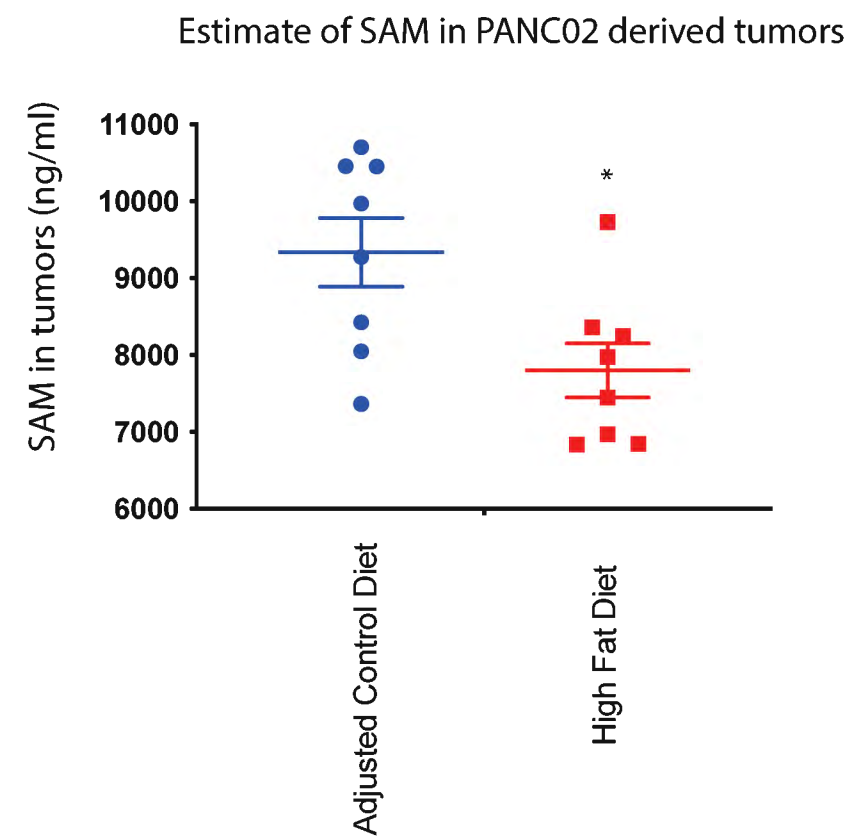



Fold change in mRNA expression  
(Normalized to Control)

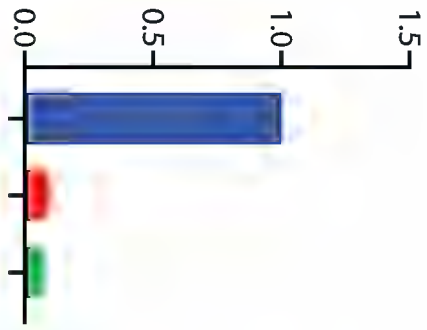

- NS
- 10nM siPRDX1
- 20nM siPRDX1

Viability  
Normalized to untreated

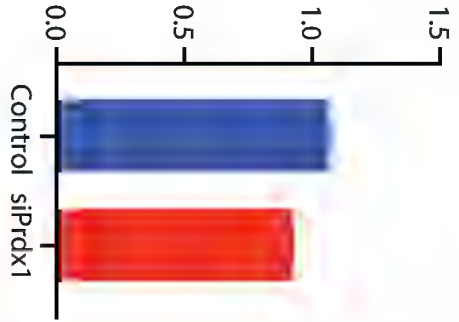

siPRDX1 efficiency

- ..... Control
- PreQ 50 nM

Fold change over control

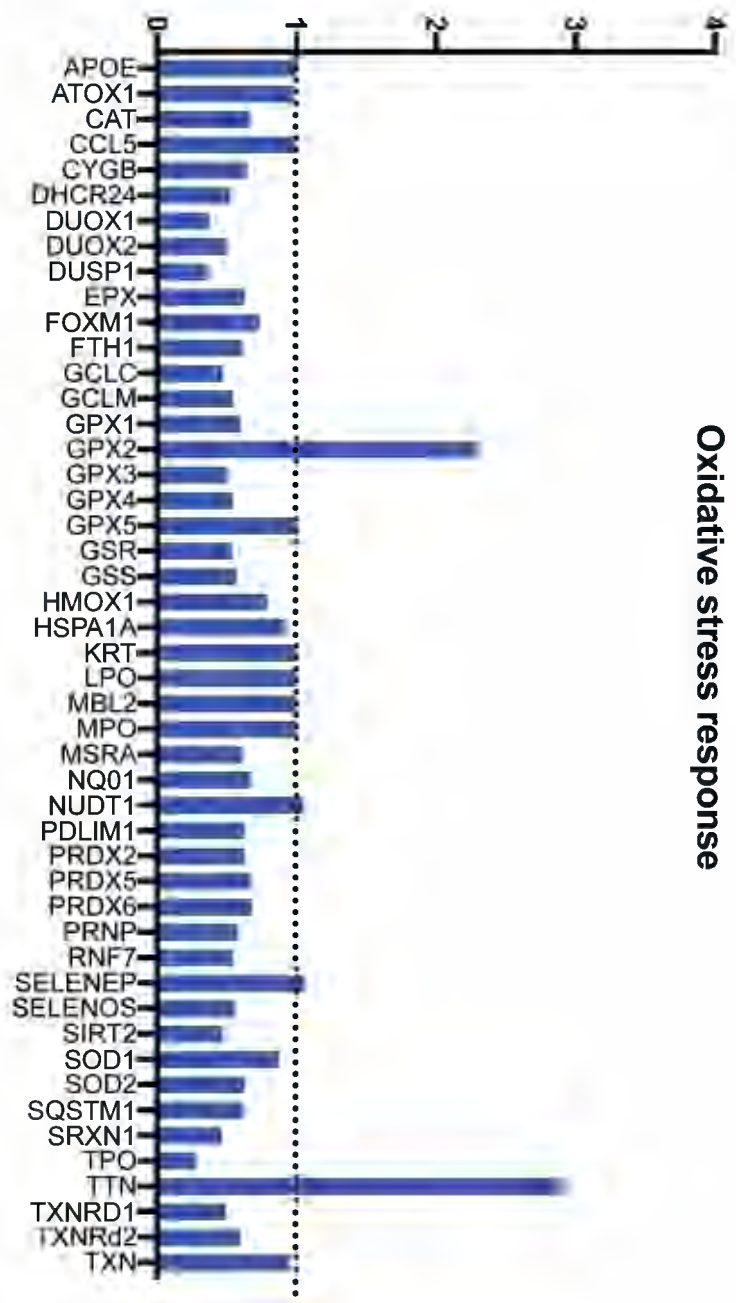

Oxidative stress response

Fold change over control

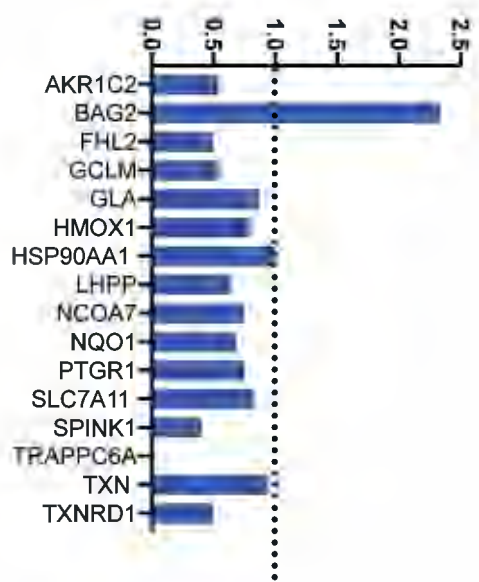

Pathway Activity

Fold change over control

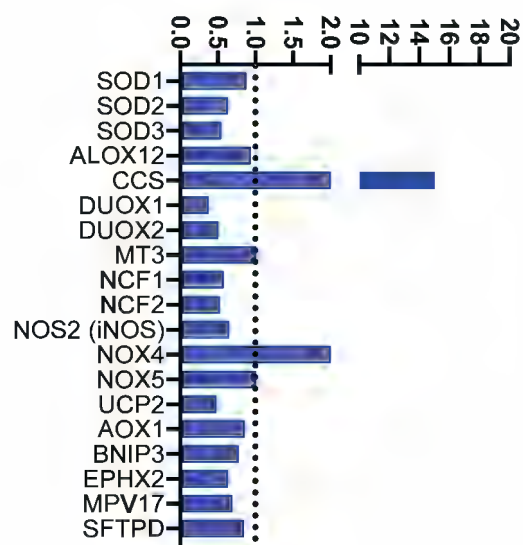

ROS metabolism

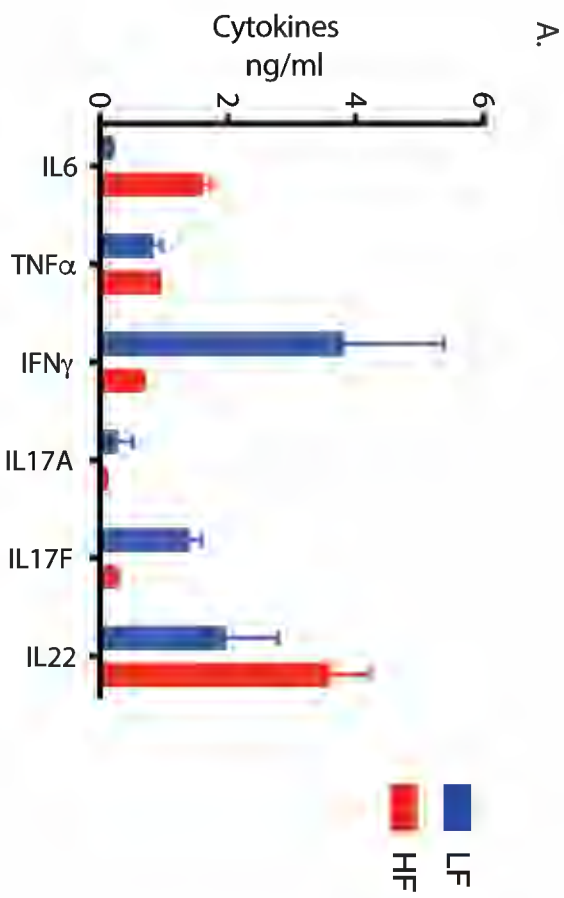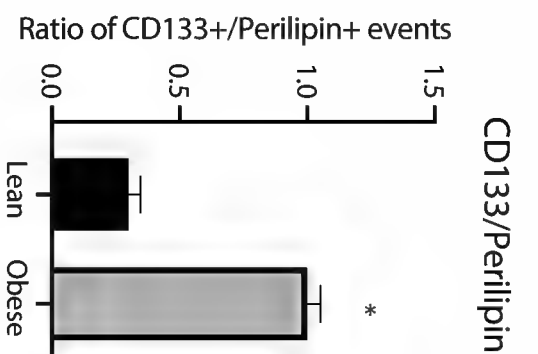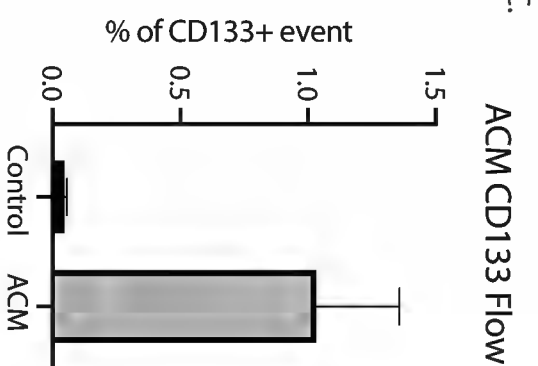

**D.** Drug resistance gene expression

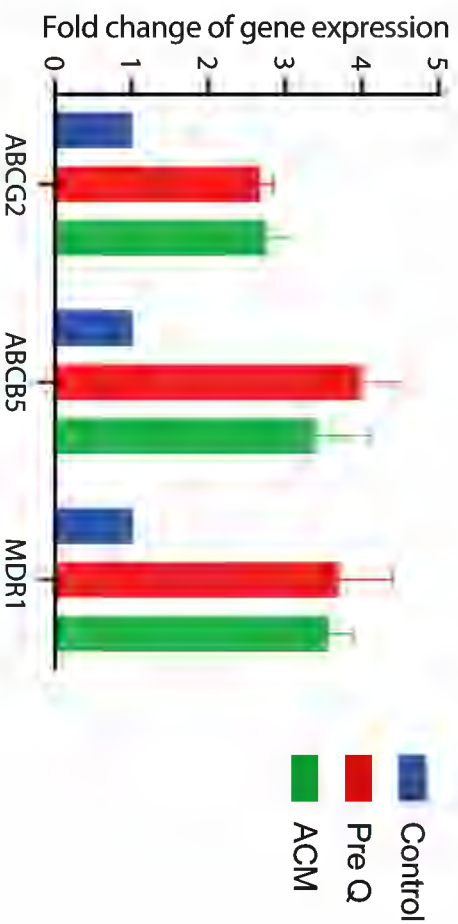

**E.** Adipocyte conditioned media

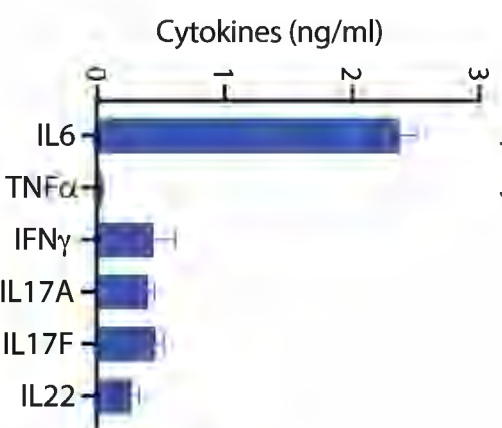

**F.**

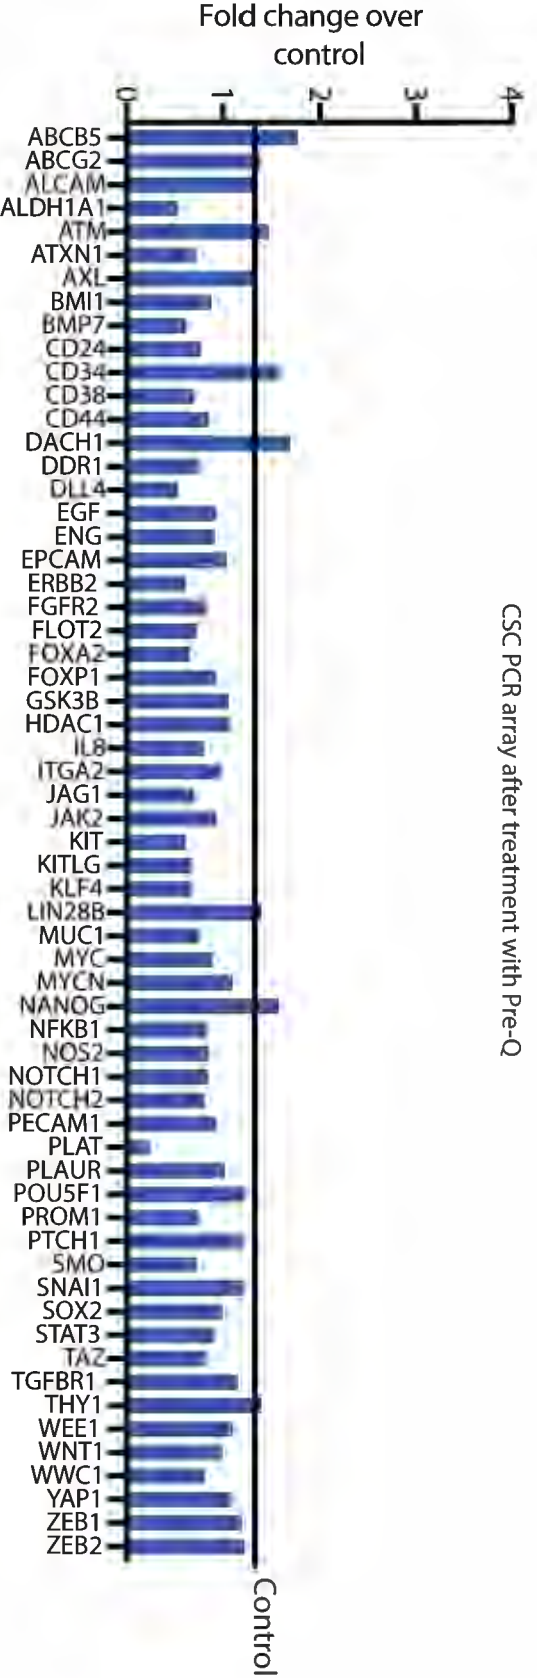

| metabolite                                          | Sample_1 | Sample_2 | Sample_3 |
|-----------------------------------------------------|----------|----------|----------|
| (AC)2-L-LYS-D-ALA                                   | 0        | 0        | 0        |
| 2-HYDROXY-2-METHYLPROPANENITRILE                    | 0        | 0        | 0        |
| 2-NAPHTHYLAMINE                                     | 0        | 0        | 0        |
| ADENOSINE                                           | 0        | 0        | 0        |
| AMINOIMIDAZOLE RIBOTIDE                             | 0        | 0        | 0        |
| AlaAlaProLeu                                        | 0        | 0        | 0        |
| DOMOILACTONE A                                      | 0        | 0        | 0        |
| FRUCTOSELYSINE                                      | 0        | 0        | 0        |
| GLUCOERYSOLIN                                       | 0        | 0        | 0        |
| GlnLeu                                              | 0        | 0        | 0        |
| IleGlyArg                                           | 0        | 0        | 0        |
| L-ALANINE                                           | 0        | 0        | 0        |
| LEU-GLY-PRO                                         | 0        | 0        | 0        |
| LeuSerPro                                           | 0        | 0        | 0        |
| N-BUTYL-N(2)-[(2Z)-2-(2-FURYL)-2-(METHOXYIMINO)ACET | 0        | 0        | 0        |
| N-HYDROXYDEBRISOQUINE O-GLUCURONIDE                 | 0        | 0        | 0        |
| PIPERIDEINE                                         | 0        | 0        | 0        |
| QUINOLINE YELLOW                                    | 0        | 0        | 0        |
| SUBAPHYLLIN                                         | 0        | 0        | 0        |
| SUCROSE                                             | 0        | 0        | 0        |
| TrpSer                                              | 0        | 0        | 0        |
| XANTHINE                                            | 0        | 0        | 0        |
| N-ACETYLNEURAMINATE                                 | 0        | 0.014    | 0.122    |
| MONO(2-ETHYLHEXYL) PHTHALATE(1-)                    | 0        | 0.054    | 0.209    |
| L-METHIONINE S-OXIDE                                | 0.001    | 0.022    | 0.039    |
| CARBETAMIDE                                         | 0.035    | 0        | 0        |
| DIETHYLPHOSPHORIC ACID                              | 0.011    | 0.011    | 0.009    |
| ADENINE                                             | 0.572    | 0.917    | 1.693    |
| ARG-OET                                             | 0.696    | 0.392    | 0.065    |
| 7,8-DIAMINONONANOATE                                | 0        | 5.328    | 6.186    |
| BENZOATE                                            | 3.071    | 2.182    | 1.669    |
| LIBRAMYCIN A                                        | 0.565    | 0.279    | 0.085    |
| L-THREONINE                                         | 0.011    | 0.011    | 0.016    |
| L-GLUTAMIC ACID                                     | 0.615    | 169.823  | 289.421  |
| URIDINE-5-MONOPHOSPHATE                             | 0.025    | 0.082    | 0.046    |
| METHOHEXITAL                                        | 0        | 0.2      | 0.101    |
| L-METHIONINE                                        | 0.108    | 0.291    | 1.008    |
| 3-METHYLENEOXINDOLE                                 | 3.229    | 0.131    | 1.028    |
| Possibly C9H15NO6                                   | 0.023    | 0.032    | 0.041    |
| O-SUCCINYL-L-HOMOSERINE                             | 21.251   | 2.635    | 0.849    |
| GAMMA-GLUTAMYL-GAMMA-AMINO BUTYRALDEHYDE            | 255.855  | 36.884   | 132.587  |
| L-PHENYLALANINE                                     | 9.071    | 0        | 0.013    |
| 4-AMINO BUTANOATE                                   | 0.005    | 0.005    | 0.006    |
| (S)-ATPA                                            | 0.366    | 0.015    | 0.016    |

|                                                     |         |        |         |
|-----------------------------------------------------|---------|--------|---------|
| TAUROPINE                                           | 0.004   | 0      | 2.92    |
| L-LEUCINE                                           | 7.49    | 2.816  | 2.926   |
| L-PROLINE                                           | 168.793 | 30.677 | 31.69   |
| SUCCINATE                                           | 33.508  | 15.81  | 19.309  |
| BRUNFELSAMIDINE                                     | 4.003   | 5.169  | 3.852   |
| (N-TRIS[HYDROXYMETHYL]METHYL-2-AMINOETHANESULF(     | 4.154   | 0.632  | 0.118   |
| N2-(D-1-CARBOXYETHYL)-L-LYSINE                      | 11.77   | 3.123  | 632.531 |
| 3',5'-CYCLIC GMP                                    | 56.53   | 0      | 0       |
| GAMMA-L-GLUTAMYL-D-ALANINE                          | 1.605   | 0.768  | 0.477   |
| CHLORDANE                                           | 1.692   | 4.354  | 1.843   |
| 6-[(4-HYDROXY-3-NITROPHENYL)ACETAMIDO]CAPROATE      | 5.31    | 0      | 0       |
| 1-AMINOCYCLOPROPANE-1-CARBOXYLATE                   | 5.024   | 5.714  | 4.426   |
| LL-2,6-DIAMINOHEPTANEDIOATE                         | 22.323  | 1.369  | 4.836   |
| 5-BENZYL-1-(2-HYDROXYETHOXYMETHYL)URACIL            | 2.445   | 15.074 | 34.989  |
| N(2)-[(R)-2-AMINO-2-PHENYLACETYL]-N-BUTYL-L-SERINAN | 0.026   | 0      | 0       |
| SN-GLYCERO-3-PHOSPHOETHANOLAMINE                    | 7.856   | 6.332  | 1.724   |
| N(6)-ACETONYLLYSINE                                 | 7.559   | 6.885  | 1.876   |
| L-ORNITHINE                                         | 0.04    | 0.178  | 0.198   |
| PIPECOLATE                                          | 0.968   | 0.881  | 0.867   |
| 4-OXOPROLINE                                        | 19.446  | 26.152 | 40.148  |
| L-ALPHA-GLYCEROPHOSPHOCHOLINE                       | 4.339   | 12.786 | 4.933   |
| L-TYROSYL-L-ARGININE                                | 0       | 0      | 0.469   |
| GANCIDIN W                                          | 29.648  | 1.019  | 3.182   |
| FRUCTOSELYSINE 6-PHOSPHATE                          | 0.815   | 0.54   | 0.436   |
| 2,4-DIACETAMIDO-2,4,6-TRIDEOXY-BETA-L-ALTROSE       | 0.997   | 1.058  | 1.24    |
| L-TYROSINE                                          | 17.234  | 26.062 | 20.728  |
| N-(6-AMINOHEXANOYL)-6-AMINOHEXANOATE                | 3.376   | 1.649  | 5.392   |
| L-VALINE                                            | 45.695  | 5.801  | 51.649  |
| METHYL-CCNU                                         | 4.088   | 0      | 1.77    |
| PIPERIDINE                                          | 2.592   | 1.739  | 1.88    |
| Possibly C4HN3O5P5                                  | 1.295   | 1.102  | 1.799   |
| N6-ACETYL-N6-HYDROXY-L-LYSINE                       | 37.403  | 42.004 | 30.894  |
| BETA-ALANYL-L-LYSINE                                | 16.294  | 7.881  | 12.628  |
| INDOLE                                              | 31.051  | 11.506 | 12.76   |
| N-PHENYLACETAMIDE                                   | 1.941   | 2.023  | 1.758   |
| L-ASPARTATE                                         | 18.426  | 10.495 | 6.447   |
| L-GLUTAMINE                                         | 14.771  | 14.139 | 14.797  |
| PENTALENE                                           | 0.013   | 0.012  | 0.01    |
| BETA-ALANYL-L-ARGININE                              | 12.036  | 0      | 29.958  |
| L-ARGININE                                          | 44.623  | 37.095 | 42.838  |
| 4,6-DIDEOXY-4-(3-DEOXY-L-GLYCERO-TETRONAMIDO)-2-O-  | 1.018   | 0.166  | 0.595   |
| PROCLAVAMINIC ACID                                  | 4.424   | 3.657  | 5.126   |
| 4-GUANIDINOBUTANAL                                  | 3.97    | 3.705  | 3.892   |
| L-SERINE                                            | 0.932   | 1.539  | 4.558   |
| L-HISTIDINE                                         | 18.536  | 13.086 | 13.866  |

|                                  |         |         |         |
|----------------------------------|---------|---------|---------|
| 2-(6`-METHYLTHIO)HEXYLMALIC ACID | 0.307   | 6.504   | 11.51   |
| L-ASPARAGINE                     | 0.677   | 3.355   | 0.302   |
| DIACETYL                         | 6.328   | 6.032   | 5.919   |
| HIS-LEU                          | 0.368   | 0.275   | 0.126   |
| GLYCYL-LEUCINE                   | 118.55  | 137.731 | 122.92  |
| L-LYSINE                         | 8.073   | 1.855   | 2.757   |
| ADENOSINE 5'-MONOPHOSPHATE       | 4.427   | 12.397  | 0.922   |
| MURAMIC ACID                     | 0.132   | 0.03    | 0.053   |
| INDOLINE                         | 1.075   | 1.004   | 1.002   |
| UNK MZ 190.1437 RT 0.60          | 50.777  | 495.861 | 316.308 |
| WIN54954                         | 0.016   | 0       | 0       |
| L-TRYPTOPHAN                     | 166.953 | 51.873  | 0.691   |
| 5'-METHYLTHIOADENOSINE           | 0.506   | 3.289   | 0.027   |
| 3',5'-CYCLIC AMP                 | 0.099   | 0       | 0       |

| Sample_4 | Sample_5 | LF       | Sample_8 | Sample_9 | Sample_10 | Sample_11 |
|----------|----------|----------|----------|----------|-----------|-----------|
| 0        | 0        | 0        | 0        | 0        | 0         | 0         |
| 0        | 0        | 0        | 0        | 0.178    | 0         | 0         |
| 0        | 0        | 0        | 0        | 9.297    | 25.927    | 0         |
| 0        | 0        | 0        | 54.321   | 0.019    | 0         | 0         |
| 0        | 0        | 0        | 0        | 6.278    | 0         | 0         |
| 0        | 0        | 0        | 0        | 0.038    | 0         | 0         |
| 0        | 0        | 0        | 0        | 0.116    | 0         | 0         |
| 0        | 0        | 0        | 0        | 0        | 0         | 0         |
| 0        | 0        | 0        | 0        | 0        | 0         | 0         |
| 0        | 0        | 0        | 0        | 0        | 0         | 0         |
| 0        | 0        | 0        | 0        | 0        | 0         | 0.087     |
| 0        | 0        | 0        | 8.469    | 14.418   | 0         | 0         |
| 0        | 0        | 0        | 0        | 0        | 0         | 0         |
| 0        | 0        | 0        | 0        | 0.214    | 0         | 0         |
| 0        | 0        | 0        | 0.087    | 0.037    | 0         | 0         |
| 0        | 0        | 0        | 0        | 0        | 0         | 0         |
| 0        | 0        | 0        | 0        | 0.768    | 0         | 0         |
| 0        | 0        | 0        | 0        | 0        | 0         | 0         |
| 0        | 0        | 0        | 13.07    | 0.459    | 0         | 0         |
| 0        | 0        | 0        | 0.348    | 0        | 0         | 0         |
| 0        | 0        | 0        | 0        | 0        | 0         | 0         |
| 0        | 0        | 0        | 0.192    | 0        | 0         | 0         |
| 0.112    | 0.019    | 0.0534   | 23.034   | 0        | 0.019     | 0.022     |
| 0.357    | 0        | 0.124    | 40.136   | 0.553    | 1.323     | 5.369     |
| 0.063    | 0.009    | 0.0268   | 0.374    | 5.579    | 0.059     | 0.054     |
| 0.048    | 0        | 0.0166   | 1.763    | 0.043    | 0.028     | 0         |
| 0.01     | 0.008    | 0.0098   | 0.06     | 0.981    | 0.008     | 0.01      |
| 0.793    | 0.166    | 0.8282   | 33.44    | 0.461    | 1.627     | 17.151    |
| 0.34     | 0.321    | 0.3628   | 0.766    | 16.844   | 0.176     | 0.698     |
| 2.138    | 1.451    | 3.0206   | 10.568   | 84.727   | 12.622    | 3.376     |
| 1.913    | 2.321    | 2.2312   | 77.294   | 1.265    | 0.648     | 1.511     |
| 0        | 0.246    | 0.235    | 1.444    | 0.433    | 0.192     | 0.372     |
| 0.009    | 0.03     | 0.0154   | 0.024    | 0.317    | 0.004     | 0.119     |
| 197.472  | 48.312   | 141.1286 | 1444.951 | 13.244   | 104.621   | 1.029     |
| 0        | 0.054    | 0.0414   | 0.182    | 0.349    | 0.078     | 0.058     |
| 0.296    | 0.337    | 0.1868   | 0        | 0.28     | 1.083     | 0.851     |
| 0.848    | 0.072    | 0.4654   | 0.396    | 3.311    | 0.26      | 1.098     |
| 0.354    | 0.089    | 0.9662   | 2.226    | 8.124    | 0.182     | 0.175     |
| 0.058    | 0.061    | 0.043    | 0.024    | 0.261    | 0.038     | 0.072     |
| 3.537    | 13.56    | 8.3664   | 0.61     | 69.165   | 1.4       | 6.493     |
| 112.779  | 174.674  | 142.5558 | 151.929  | 233.796  | 522.378   | 205.532   |
| 0.01     | 0.001    | 1.819    | 1.605    | 8.071    | 3.922     | 3.41      |
| 0.006    | 0.006    | 0.0056   | 0.005    | 0.033    | 0.004     | 0.005     |
| 0.012    | 0.118    | 0.1054   | 0.107    | 0.322    | 0.175     | 0.344     |

|         |         |          |         |        |         |         |
|---------|---------|----------|---------|--------|---------|---------|
| 0.308   | 1.91    | 1.0284   | 0       | 0.046  | 0.916   | 6.558   |
| 4.985   | 3.827   | 4.4088   | 4.379   | 10.562 | 5.947   | 11.594  |
| 70.209  | 89.271  | 78.128   | 56.083  | 7.572  | 20.183  | 95.89   |
| 3.139   | 22.306  | 18.8144  | 25.044  | 44.778 | 21.303  | 29.18   |
| 4.005   | 2.95    | 3.9958   | 10.137  | 5.91   | 3.833   | 3.597   |
| 1.334   | 1.569   | 1.5614   | 3.593   | 2.997  | 0.141   | 4.153   |
| 368.938 | 278.142 | 258.9008 | 297.463 | 7.495  | 194.364 | 540.004 |
| 0       | 0       | 11.306   | 0       | 0      | 0       | 78.424  |
| 0.783   | 0.411   | 0.8088   | 2.701   | 0.486  | 0.795   | 0.923   |
| 4.398   | 3.586   | 3.1746   | 0.668   | 2.125  | 1.326   | 7.375   |
| 0       | 0       | 1.062    | 6.828   | 0      | 0       | 0       |
| 6.043   | 4.649   | 5.1712   | 4.71    | 0      | 4.087   | 5.894   |
| 12.263  | 15.291  | 11.2164  | 5.454   | 10.997 | 0.926   | 12.107  |
| 5.235   | 0       | 11.5486  | 50.234  | 2.835  | 9.256   | 6.673   |
| 0       | 0.04    | 0.0132   | 0.034   | 0      | 0.02    | 0       |
| 2.39    | 2.694   | 4.1992   | 4.023   | 3.256  | 7.732   | 3.77    |
| 7.646   | 4.318   | 5.6568   | 20.733  | 0      | 2.196   | 6.365   |
| 0.183   | 0.078   | 0.1354   | 0.248   | 0.066  | 0.175   | 0.111   |
| 0.876   | 0.91    | 0.9004   | 0.726   | 1.987  | 0.614   | 0.882   |
| 18.377  | 36.571  | 28.1388  | 40.943  | 9.312  | 42.156  | 26.116  |
| 0       | 12.455  | 6.9026   | 7.339   | 10.883 | 8.003   | 1.926   |
| 0       | 0       | 0.0938   | 0.508   | 0      | 0       | 0       |
| 0.75    | 14.019  | 9.7236   | 4.564   | 3.299  | 1.334   | 1.255   |
| 1.121   | 0.495   | 0.6814   | 0.295   | 0.812  | 0.676   | 0.766   |
| 2.423   | 0.669   | 1.2774   | 0.494   | 1.68   | 1.854   | 1.23    |
| 21.404  | 21.33   | 21.3516  | 16.842  | 15.316 | 24.447  | 22.232  |
| 0.243   | 9.593   | 4.0506   | 3.837   | 0.776  | 5.974   | 2.377   |
| 40.218  | 34.078  | 35.4882  | 50.683  | 17.148 | 30.512  | 30.93   |
| 0       | 5.772   | 2.326    | 5.026   | 0      | 0       | 0       |
| 3.058   | 2.281   | 2.31     | 1.983   | 0.857  | 1.308   | 3.448   |
| 2.993   | 1.44    | 1.7258   | 0.637   | 4.183  | 1.012   | 1.438   |
| 36.416  | 107.255 | 50.7944  | 46.564  | 12.379 | 44.735  | 42.998  |
| 9.396   | 10.711  | 11.382   | 17.801  | 0.032  | 5.316   | 17.462  |
| 12.491  | 9.249   | 15.4114  | 6.534   | 7.9    | 1.655   | 24.244  |
| 3.532   | 1.219   | 2.0946   | 1.223   | 0.283  | 1.593   | 1.842   |
| 5.857   | 24.766  | 13.1982  | 14.782  | 6.492  | 8.454   | 11.068  |
| 14.276  | 18.241  | 15.2448  | 3.767   | 18.656 | 8.808   | 14.074  |
| 0.007   | 0.007   | 0.0098   | 0.01    | 0.005  | 0.01    | 0.005   |
| 27.369  | 0       | 13.8726  | 44.202  | 0      | 0       | 0       |
| 46.292  | 61.223  | 46.4142  | 14.758  | 0.105  | 49.246  | 60.886  |
| 0.277   | 1.494   | 0.71     | 0.378   | 0      | 0.832   | 0.996   |
| 4.69    | 8.039   | 5.1872   | 1.106   | 0.389  | 3.771   | 5.86    |
| 4.84    | 4.75    | 4.2314   | 4.879   | 0.038  | 1.802   | 3.956   |
| 0.029   | 0.387   | 1.489    | 2.021   | 0.564  | 0.763   | 1.655   |
| 16.04   | 22.073  | 16.7202  | 5.741   | 11.444 | 13.463  | 13.674  |

|         |         |          |        |        |         |        |
|---------|---------|----------|--------|--------|---------|--------|
| 15.595  | 15.74   | 9.9312   | 10.046 | 2.362  | 13.607  | 5.783  |
| 2.97    | 0.602   | 1.5812   | 0.032  | 0.078  | 2.35    | 1.616  |
| 2.288   | 2.483   | 4.61     | 4.54   | 0.474  | 4.173   | 1.066  |
| 0.257   | 0.412   | 0.2876   | 0.113  | 0      | 0.278   | 0.235  |
| 261.527 | 104.114 | 148.9684 | 31.494 | 41.848 | 94.153  | 79.439 |
| 3.088   | 2.491   | 3.6528   | 1.478  | 2.827  | 1.165   | 1.846  |
| 2.187   | 2.21    | 4.4286   | 2.177  | 0.498  | 3.411   | 2.618  |
| 0.113   | 0.075   | 0.0806   | 0.018  | 0      | 0.03    | 0.022  |
| 0.724   | 1.867   | 1.1344   | 0.663  | 0.26   | 0.375   | 0.425  |
| 27.055  | 15.899  | 181.18   | 93.58  | 28.309 | 116.153 | 51.428 |
| 0.016   | 0.018   | 0.01     | 0      | 0      | 0       | 0.013  |
| 53.19   | 0       | 54.5414  | 44.623 | 6.772  | 0       | 0      |
| 2.194   | 0       | 1.2032   | 0.032  | 0.236  | 0.109   | 0.142  |
| 0       | 0       | 0.0198   | 0      | 0      | 0       | 0      |



| Sample_12 | HF       |            |
|-----------|----------|------------|
| 0         | 0        | #DIV/0!    |
| 0         | 0.0356   | #DIV/0!    |
| 0         | 7.0448   | #DIV/0!    |
| 0         | 10.868   | #DIV/0!    |
| 0         | 1.2556   | #DIV/0!    |
| 0         | 0.0076   | #DIV/0!    |
| 0         | 0.0232   | #DIV/0!    |
| 0         | 0        | #DIV/0!    |
| 0         | 0        | #DIV/0!    |
| 0         | 0        | #DIV/0!    |
| 0         | 0.0174   | #DIV/0!    |
| 0         | 4.5774   | #DIV/0!    |
| 0         | 0        | #DIV/0!    |
| 0         | 0.0428   | #DIV/0!    |
| 0         | 0.0248   | #DIV/0!    |
| 0         | 0        | #DIV/0!    |
| 0         | 0.1536   | #DIV/0!    |
| 0         | 0        | #DIV/0!    |
| 0         | 2.7058   | #DIV/0!    |
| 0         | 0.0696   | #DIV/0!    |
| 0         | 0        | #DIV/0!    |
| 0         | 0.0384   | #DIV/0!    |
| 0.032     | 4.6214   | 86.5430712 |
| 0         | 9.4762   | 76.4209677 |
| 0.009     | 1.215    | 45.3358209 |
| 0         | 0.3668   | 22.0963855 |
| 0.008     | 0.2134   | 21.7755102 |
| 0.39      | 10.6138  | 12.8155035 |
| 0.266     | 3.75     | 10.3362734 |
| 6.872     | 23.633   | 7.82394226 |
| 1.952     | 16.534   | 7.41036214 |
| 5.721     | 1.6324   | 6.94638298 |
| 0.036     | 0.1      | 6.49350649 |
| 738.258   | 460.4206 | 3.26241882 |
| 0         | 0.1334   | 3.22222222 |
| 0         | 0.4428   | 2.37044968 |
| 0.115     | 1.036    | 2.22604211 |
| 0         | 2.1414   | 2.21631132 |
| 0.078     | 0.0946   | 2.2        |
| 11.229    | 17.7794  | 2.12509562 |
| 223.702   | 267.4674 | 1.87622952 |
| 0.003     | 3.4022   | 1.87036833 |
| 0.004     | 0.0102   | 1.82142857 |
| 0.006     | 0.1908   | 1.81024668 |

|         |          |            |
|---------|----------|------------|
| 1.384   | 1.7808   | 1.73162194 |
| 4.517   | 7.3998   | 1.6784159  |
| 410.819 | 118.1094 | 1.51174227 |
| 15.369  | 27.1348  | 1.44223573 |
| 4.691   | 5.6336   | 1.40988037 |
| 0.106   | 2.198    | 1.40771103 |
| 774.314 | 362.728  | 1.40103082 |
| 0       | 15.6848  | 1.38729878 |
| 0.607   | 1.1024   | 1.36300692 |
| 9.171   | 4.133    | 1.3018963  |
| 0       | 1.3656   | 1.28587571 |
| 17.038  | 6.3458   | 1.22714264 |
| 38.776  | 13.652   | 1.21714632 |
| 0       | 13.7996  | 1.1949154  |
| 0.024   | 0.0156   | 1.18181818 |
| 5.492   | 4.8546   | 1.15607735 |
| 2.849   | 6.4286   | 1.13643756 |
| 0.159   | 0.1518   | 1.1211226  |
| 0.796   | 1.001    | 1.11172812 |
| 34.211  | 30.5476  | 1.08560422 |
| 9.301   | 7.4904   | 1.08515632 |
| 0       | 0.1016   | 1.08315565 |
| 40.068  | 10.104   | 1.03912131 |
| 0.942   | 0.6982   | 1.02465512 |
| 0.743   | 1.2002   | 0.93956474 |
| 21.123  | 19.992   | 0.93632327 |
| 5.869   | 3.7666   | 0.92988693 |
| 31.88   | 32.2306  | 0.90820611 |
| 5.357   | 2.0766   | 0.8927773  |
| 2.643   | 2.0478   | 0.88649351 |
| 0.352   | 1.5244   | 0.8833005  |
| 76.139  | 44.563   | 0.87732112 |
| 9.263   | 9.9748   | 0.87636619 |
| 26.434  | 13.3534  | 0.86646249 |
| 3.799   | 1.748    | 0.83452688 |
| 12.06   | 10.5712  | 0.80095771 |
| 12.532  | 11.5674  | 0.75877676 |
| 0.007   | 0.0074   | 0.75510204 |
| 7.943   | 10.429   | 0.75176968 |
| 46.68   | 34.335   | 0.73975206 |
| 0.293   | 0.4998   | 0.70394366 |
| 6.734   | 3.572    | 0.68861814 |
| 3.694   | 2.8738   | 0.67916056 |
| 0.025   | 1.0056   | 0.67535259 |
| 11.632  | 11.1908  | 0.66929821 |

|        |         |            |
|--------|---------|------------|
| 0      | 6.3596  | 0.64036572 |
| 0.394  | 0.894   | 0.56539337 |
| 2.264  | 2.5034  | 0.54303688 |
| 0.149  | 0.155   | 0.53894298 |
| 131.78 | 75.7428 | 0.50844877 |
| 1.674  | 1.798   | 0.49222514 |
| 1.328  | 2.0064  | 0.45305514 |
| 0.089  | 0.0318  | 0.39454094 |
| 0.494  | 0.4434  | 0.39086742 |
| 62.561 | 70.4062 | 0.38859808 |
| 0      | 0.0026  | 0.26       |
| 0      | 10.279  | 0.18846234 |
| 0      | 0.1038  | 0.08626995 |
| 0      | 0       | 0          |
